# Supplementary material
Source: HighWire-hosted journal article supplement (https://bmjopen.bmj.com/content/9/4/e026777)
Supplement: inline-supplementary-material-2 [file inline-supplementary-material-2.pdf]

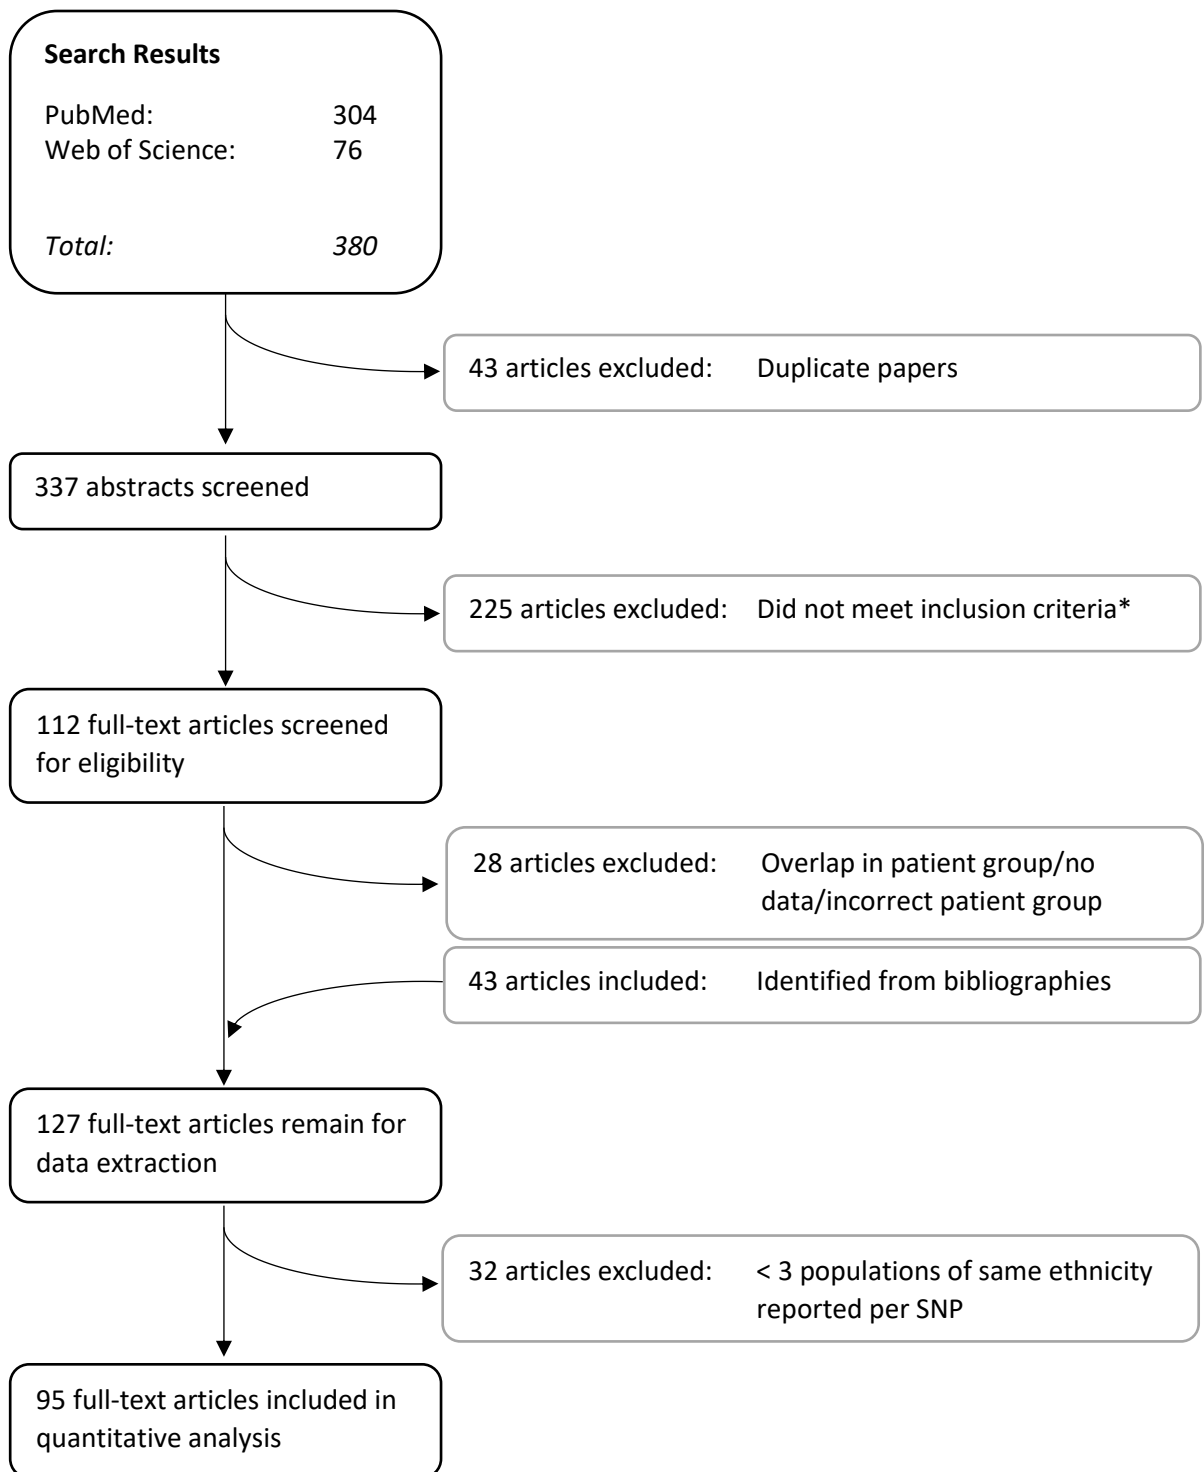

\*Inclusion criteria: Any paper was removed from the analysis if it was not written in English or Spanish (n=20), was a non-human study (n=5), was a paediatric study (n=52), was not a case-control study (n=36), did not have a renal disease phenotype (n=90), did not include data for ACE (n=13) or had a pharmaceutical drug focus (n=9)

**Supplementary Figure S1a: ACE Study Flow Diagram**

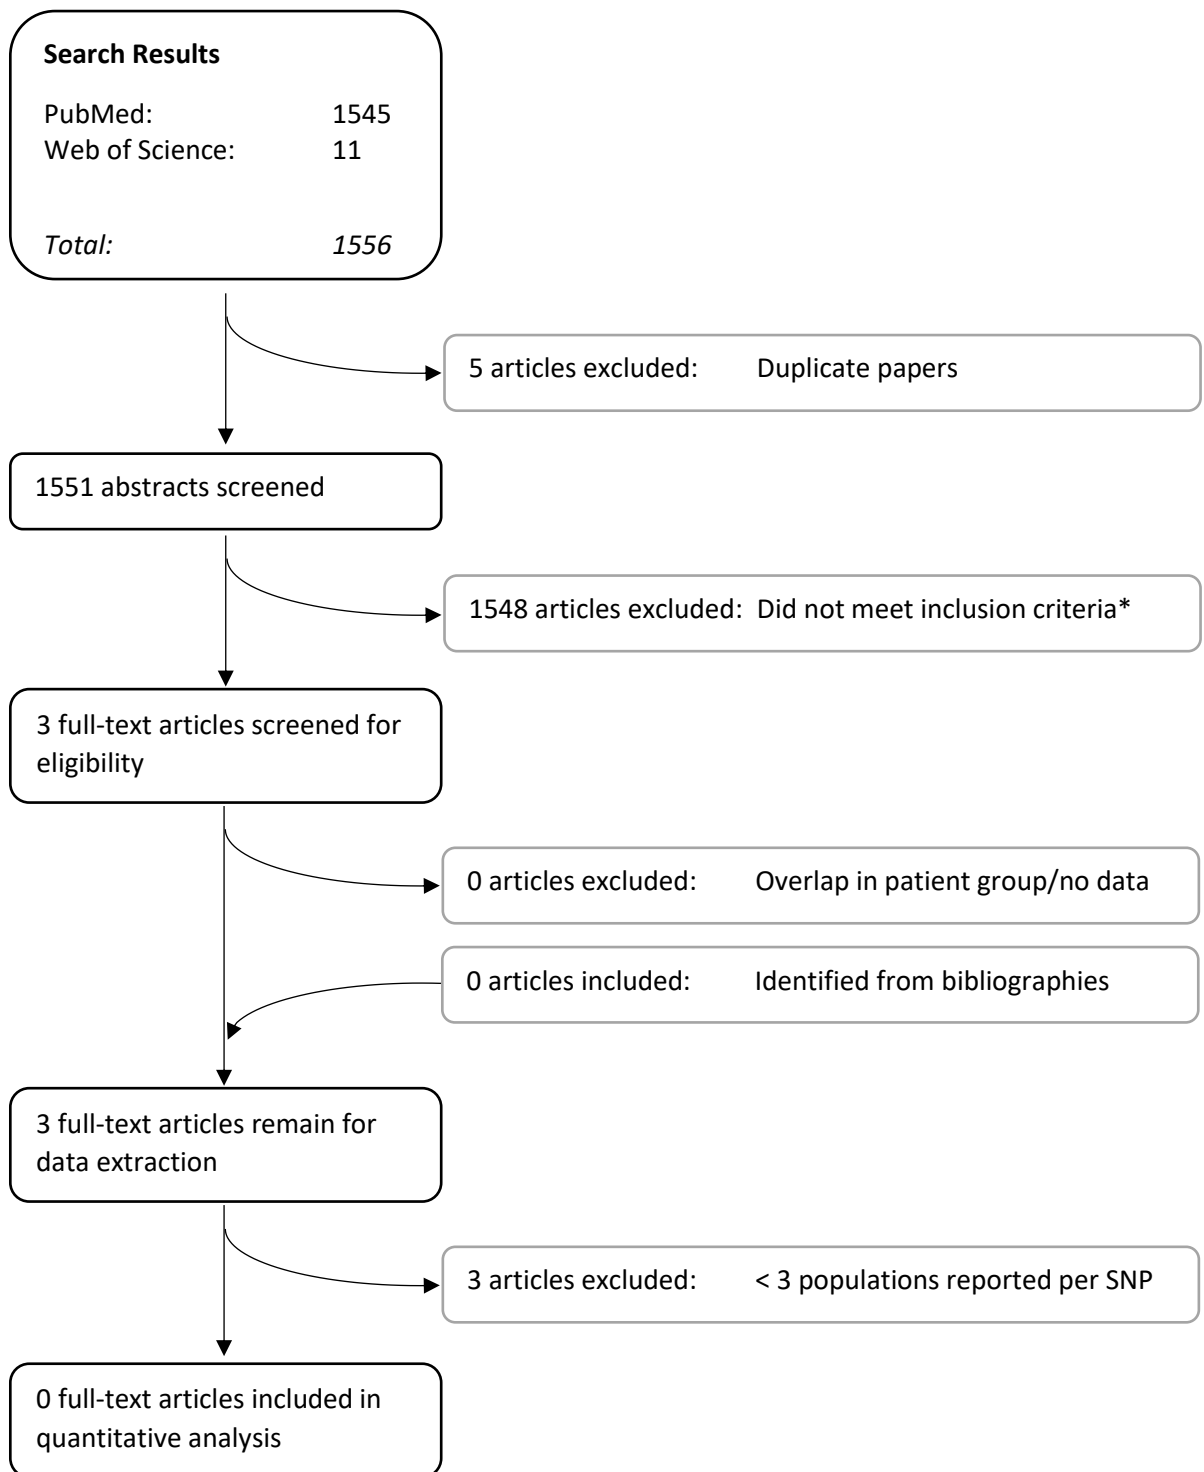

\*Inclusion criteria: Any paper was removed from the analysis if it was not written in English or Spanish (n=55), was a non-human study (n=119), was a paediatric study (n=149), was not a case-control study (n=53), did not have a renal disease phenotype (n=693), did not include data for ACE2 (n=435) or had a pharmaceutical drug focus (n=44)

**Supplementary Figure S1b: ACE2 Study Flow Diagram**

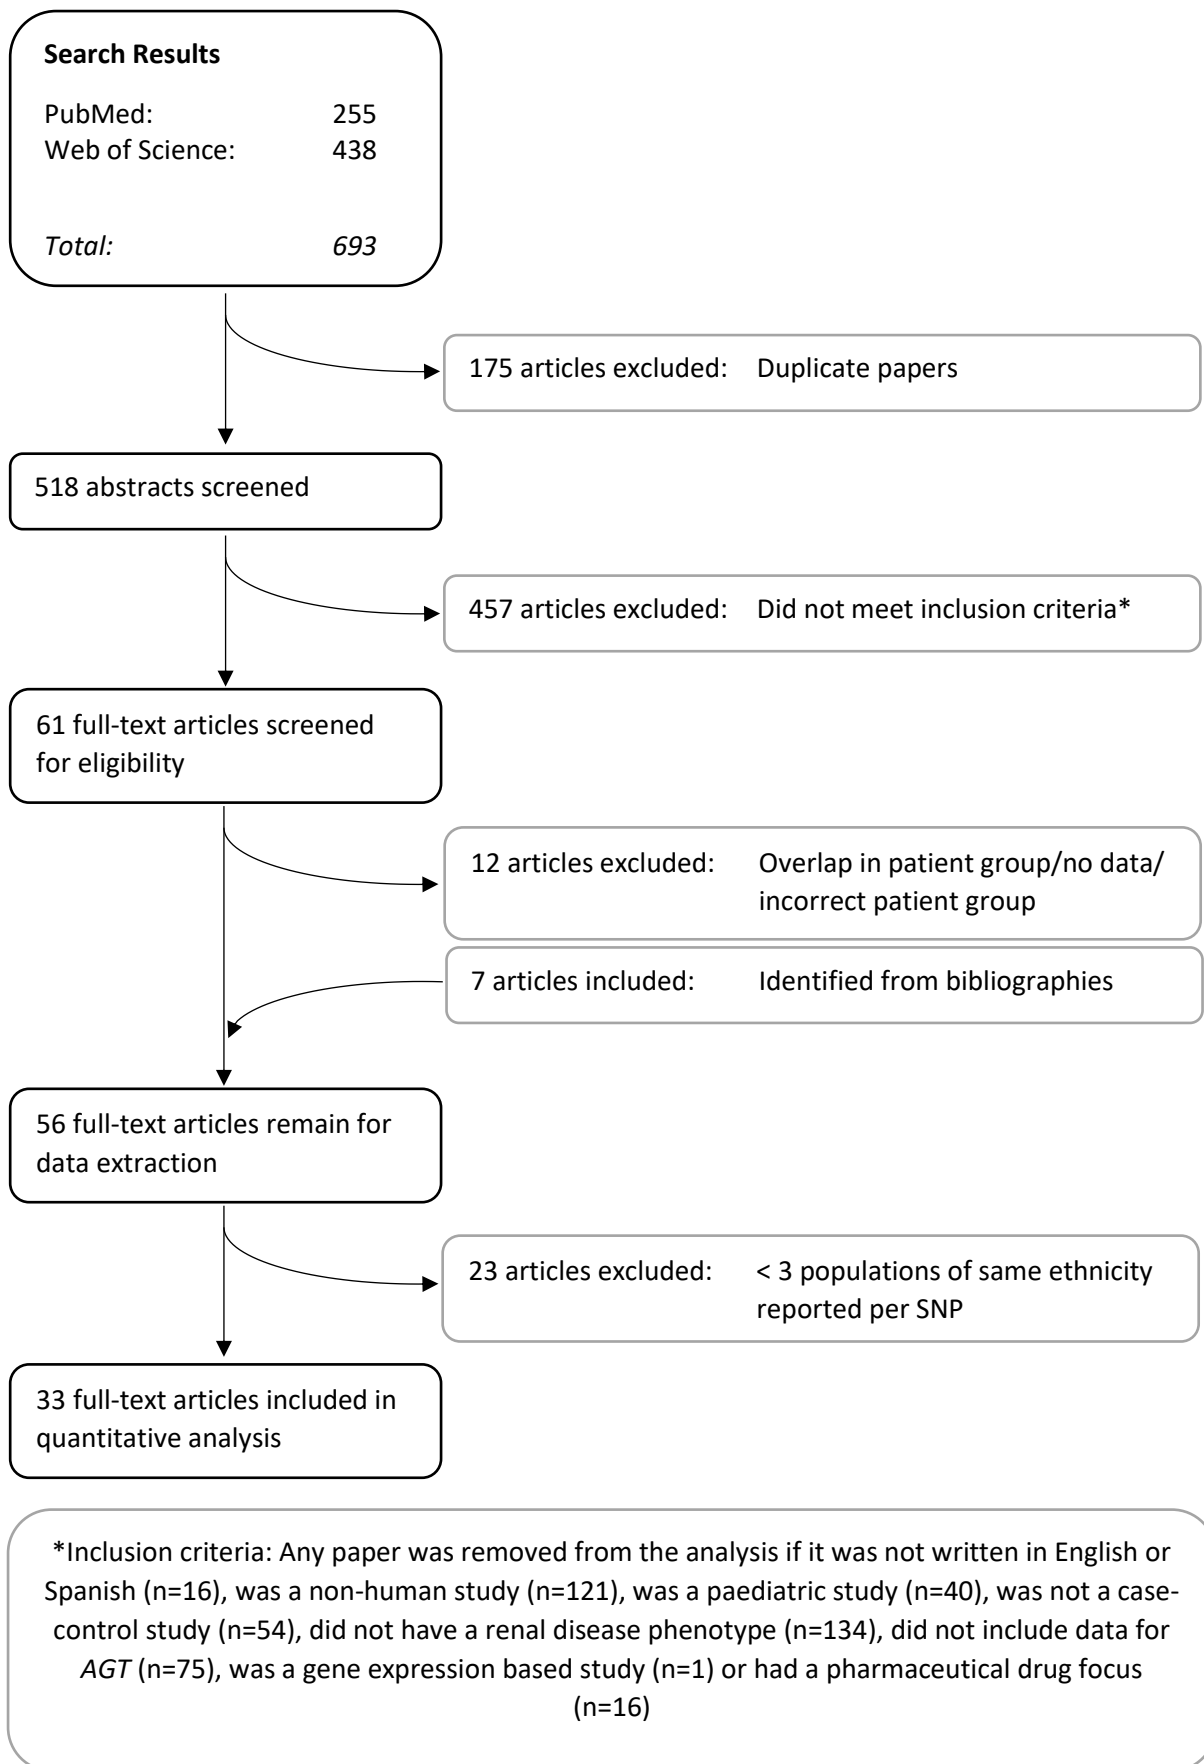

**Supplementary Figure S1c: AGT Study Flow Diagram**

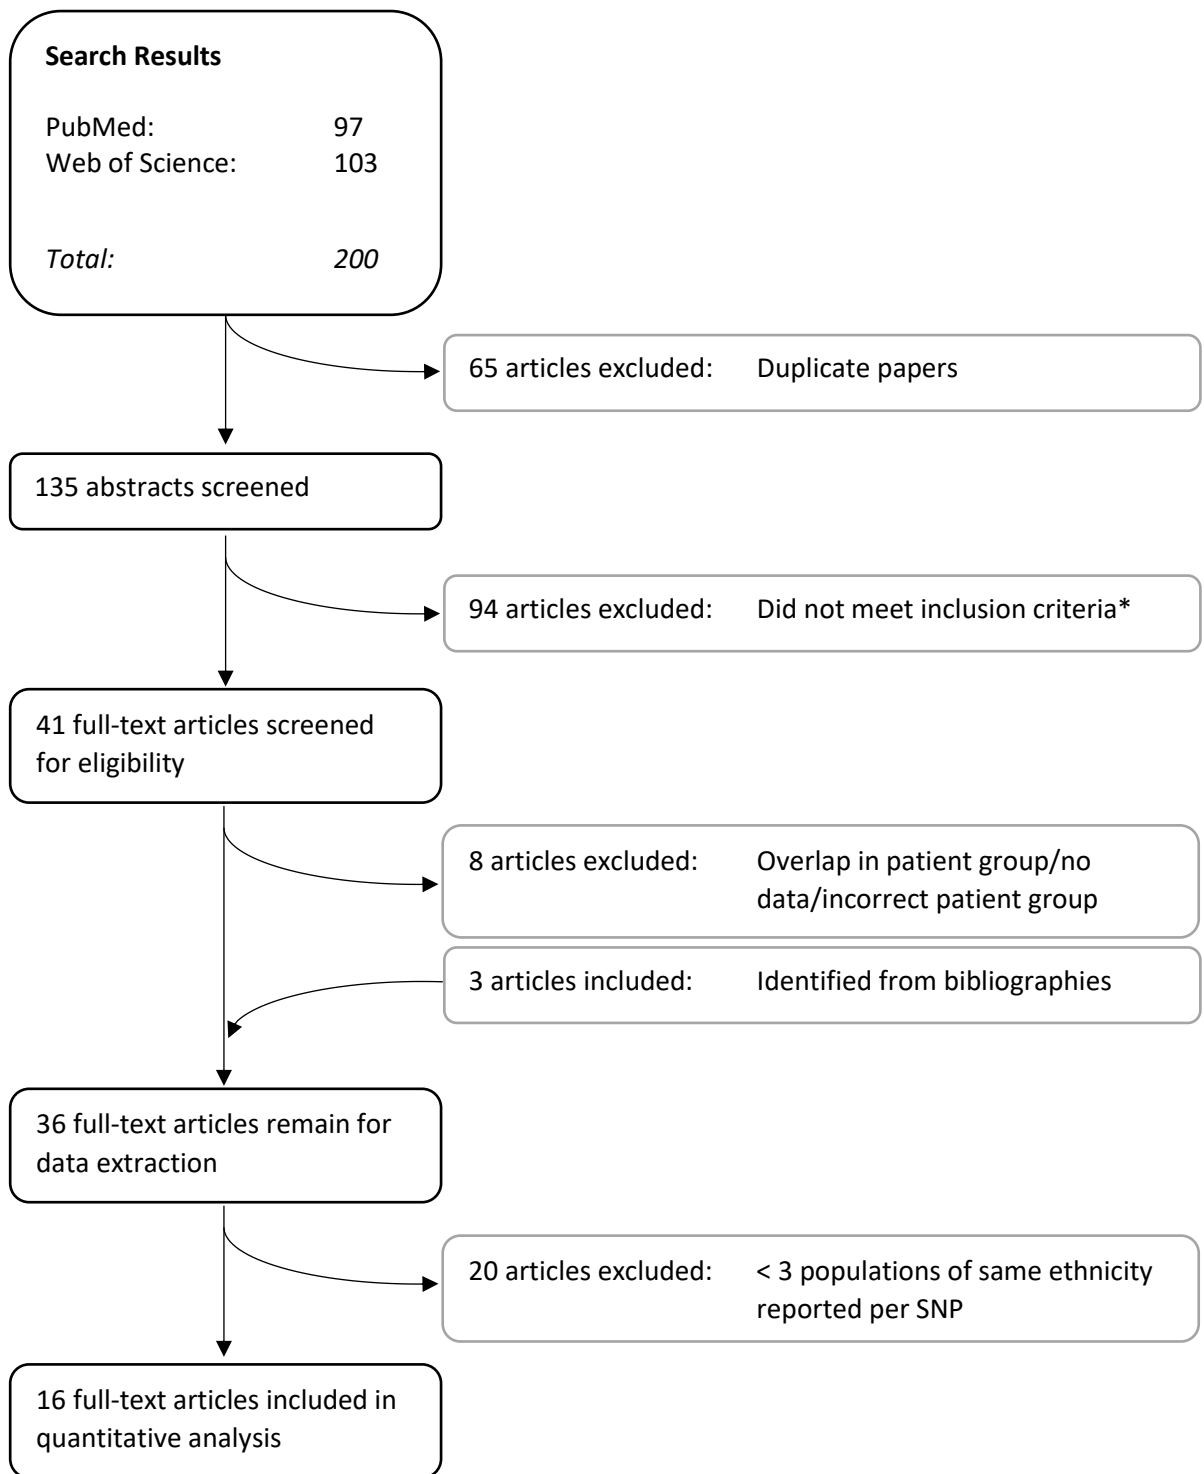

\*Inclusion criteria: Any paper was removed from the analysis if it was not written in English or Spanish (n=8), was a non-human study (n=13), was a paediatric study (n=21), was not a case-control study (n=14), did not have a renal disease phenotype (n=25), did not include data for *AGTR1* (n=3), was a gene expression based study (n=1) or had a pharmaceutical drug focus (n=9)

**Supplementary Figure S1d: AGTR1 Study Flow Diagram**

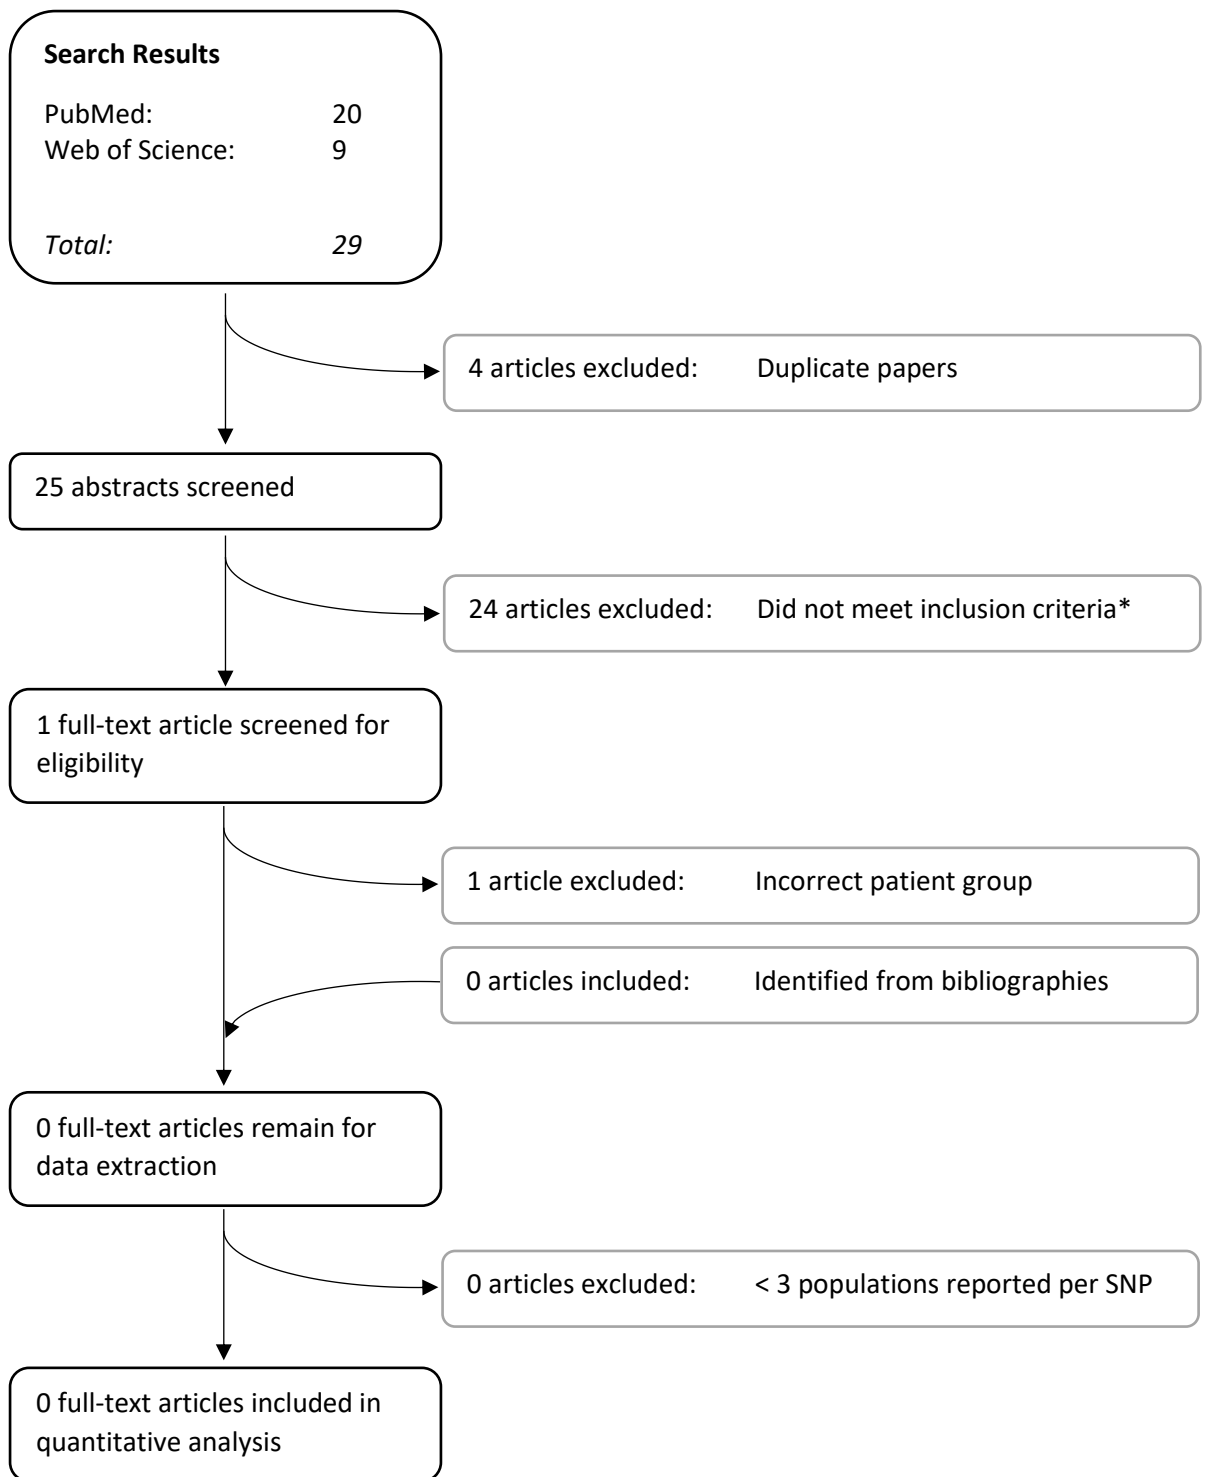

\*Inclusion criteria: Any paper was removed from the analysis if it was not written in English or Spanish (n=1), was a non-human study (n=2), was a paediatric study (n=6), was not a case-control study (n=4), did not have a renal disease phenotype (n=5) or did not include data for *AGTR2* (n=6)

**Supplementary Figure S1e: AGTR2 Study Flow Diagram**

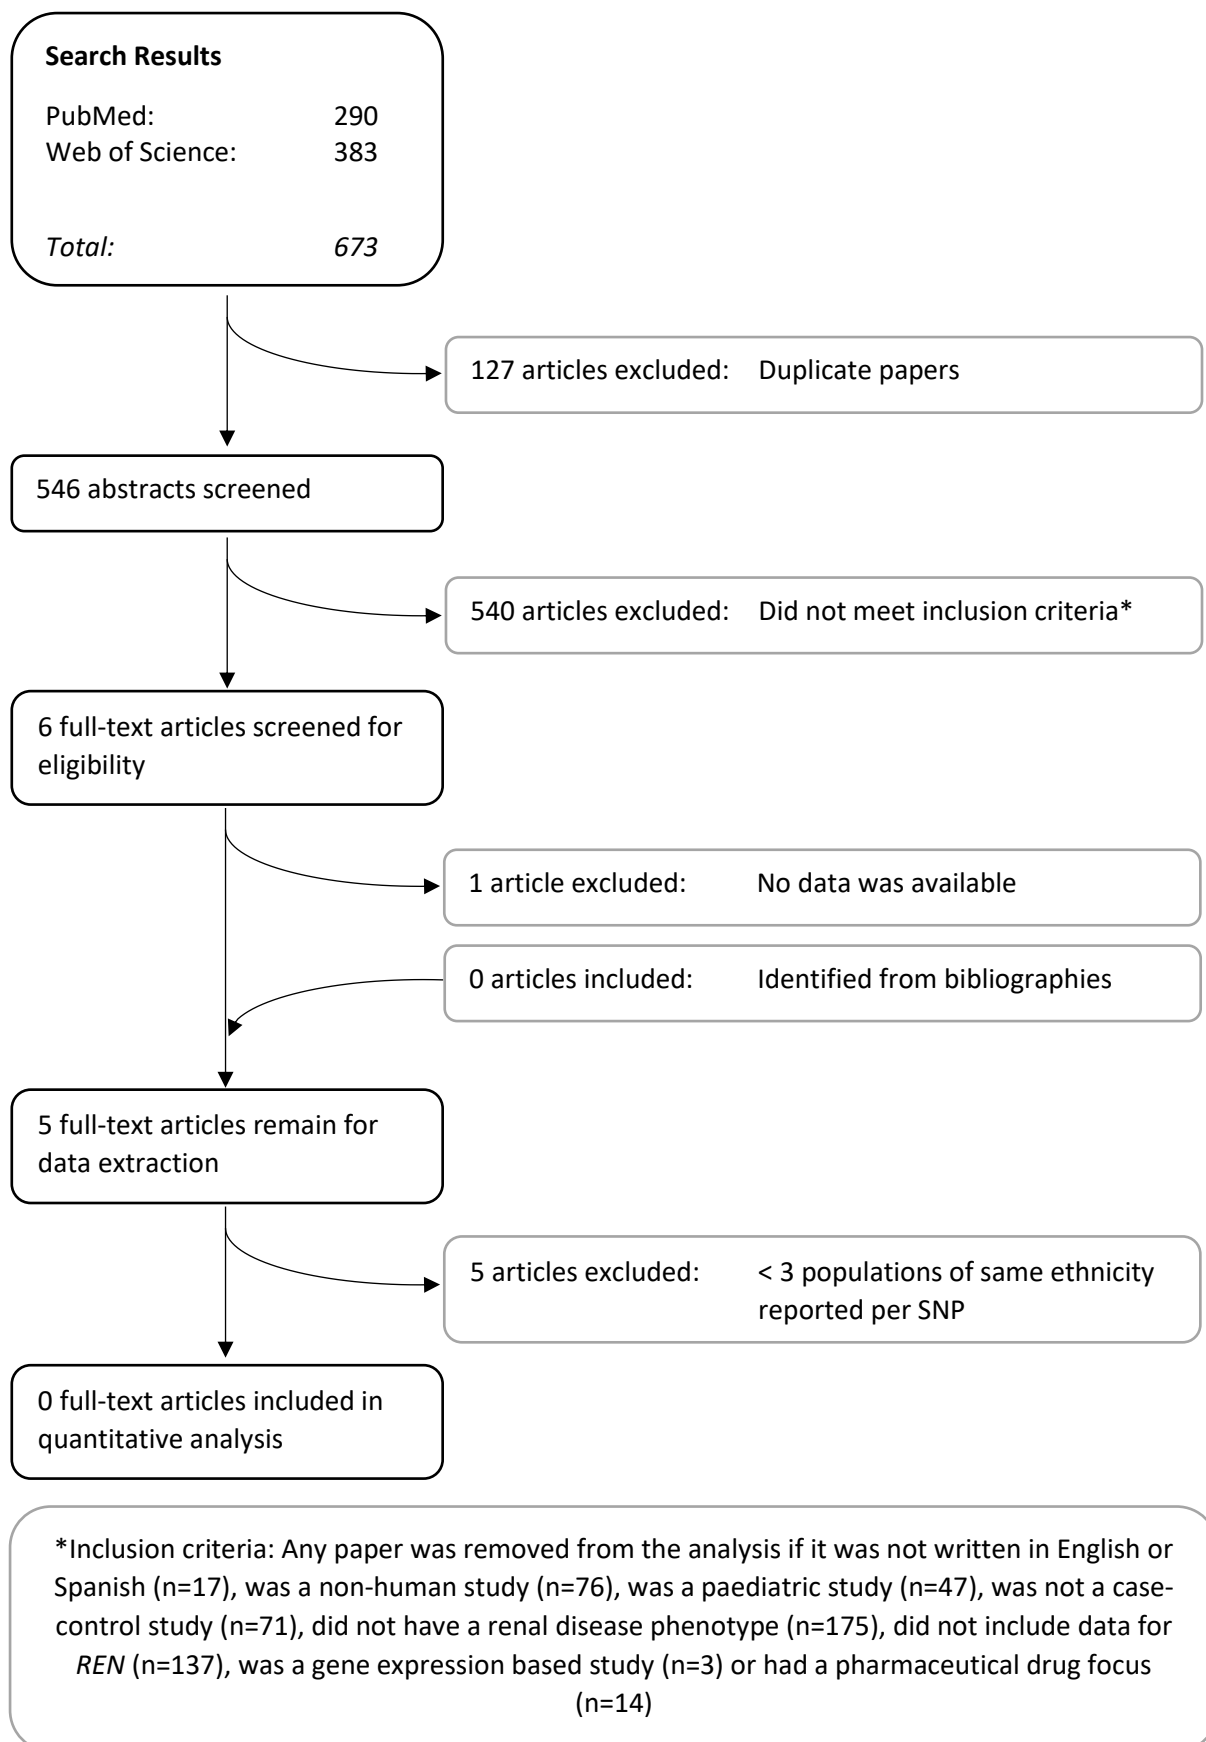

**Supplementary Figure S1f: REN Study Flow Diagram**

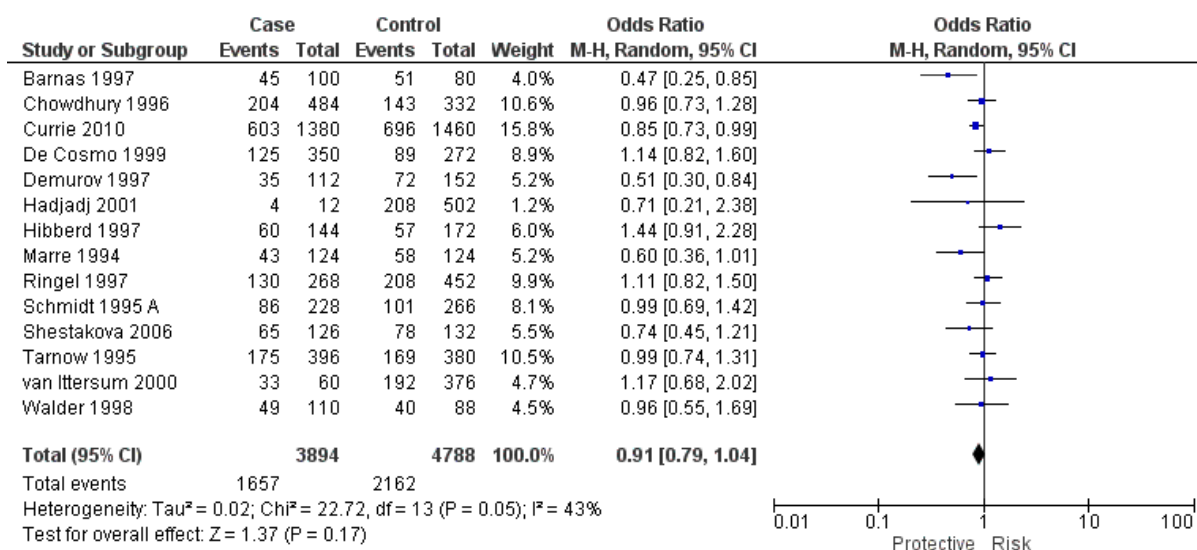

**Supplementary Figure S2a:** Forest plot - ACE I/D investigation, individuals with type 1 diabetic nephropathy compared to individuals with type 1 diabetes mellitus in a European population (ACE insertion compared to deletion).

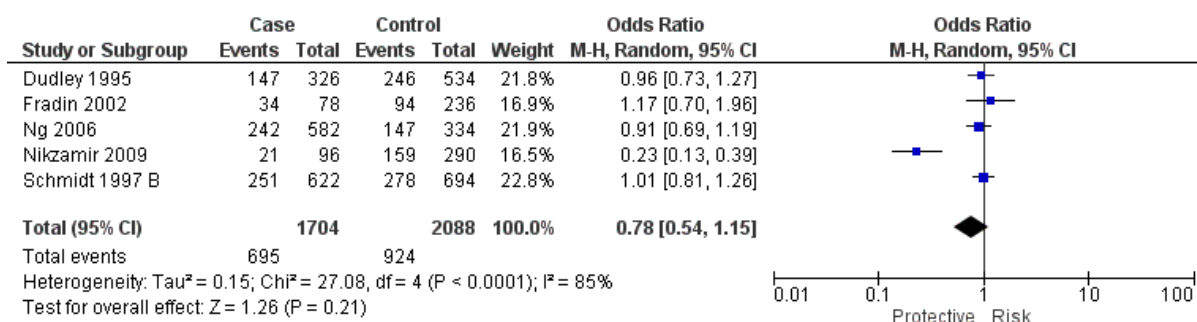

**Supplementary Figure S2b:** Forest plot - ACE I/D investigation, individuals with type 2 diabetic nephropathy compared to individuals with type 2 diabetes mellitus in a European population (ACE insertion compared to deletion).

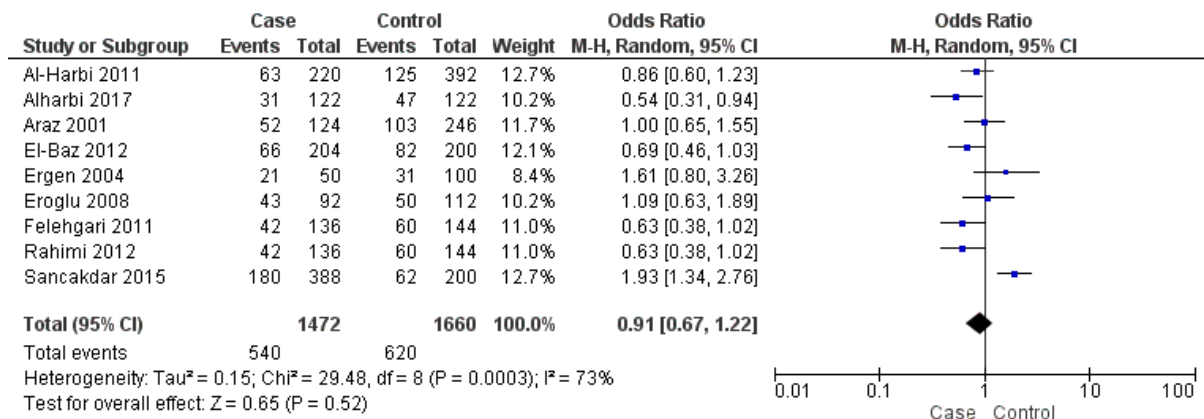

**Supplementary Figure S2c:** Forest plot - ACE I/D investigation, individuals with type 2 diabetic nephropathy compared to individuals with type 2 diabetes mellitus in a Middle Eastern population (ACE insertion compared to deletion).

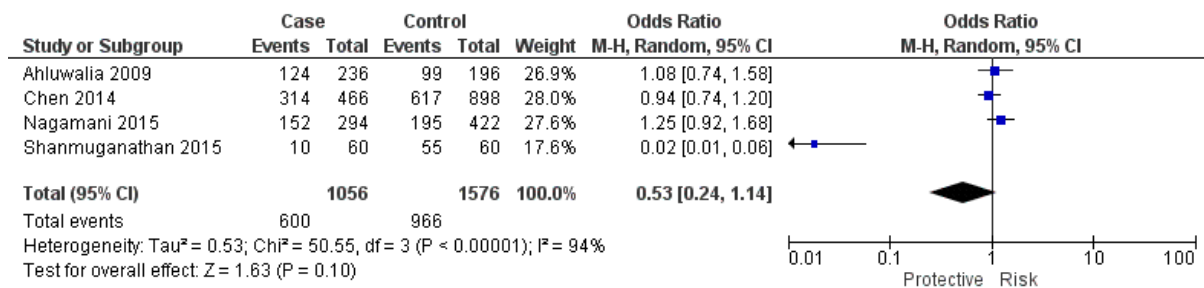

**Supplementary Figure S2d:** Forest plot - ACE I/D investigation, individuals with chronic kidney disease compared to healthy controls in a South Asian population (ACE insertion compared to deletion).



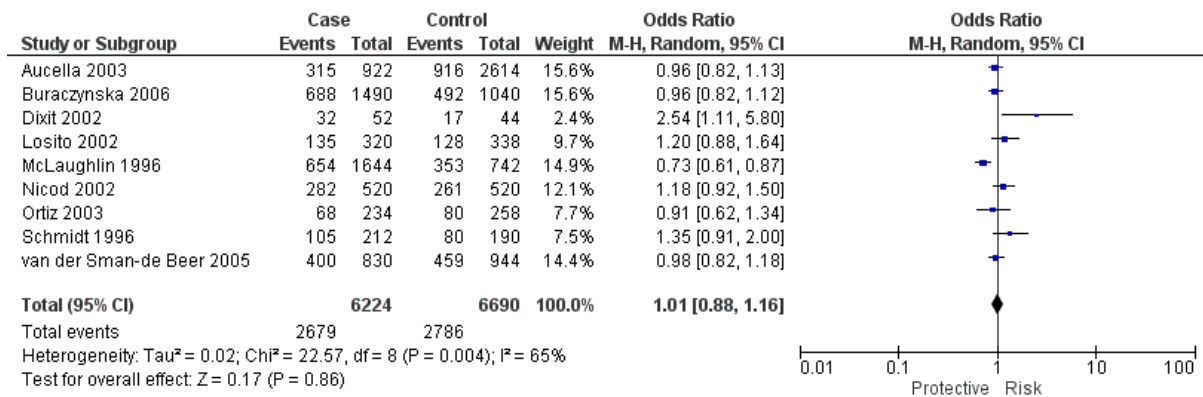

**Supplementary Figure S2e:** Forest plot - ACE I/D investigation, individuals with end-stage renal disease compared to healthy controls in a European population (ACE insertion compared to deletion).

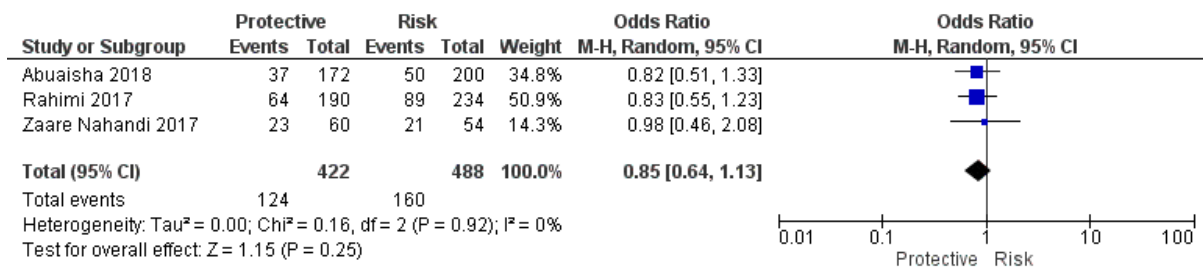

**Supplementary Figure S2f:** Forest plot - ACE I/D investigation, individuals with end-stage renal disease compared to healthy controls in a Middle Eastern population (ACE insertion compared to deletion).

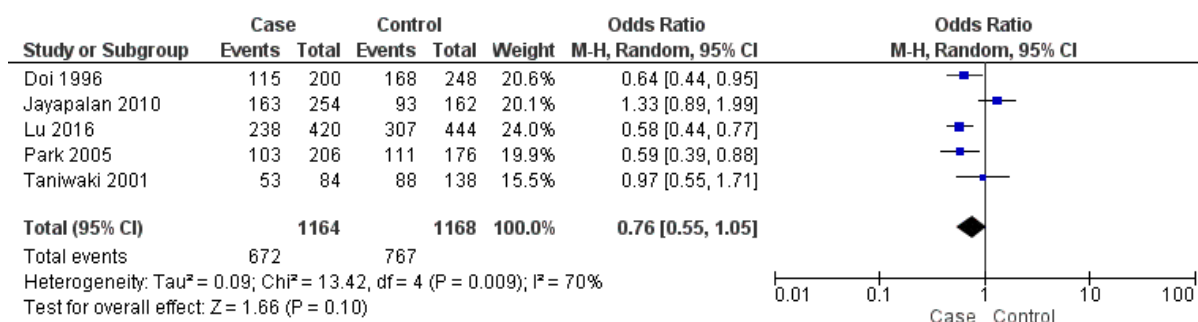

**Supplementary Figure S2g:** Forest plot - *ACE* I/D investigation, individuals with end-stage renal disease linked to type 2 diabetic nephropathy compared to individuals with type 2 diabetes mellitus in an East Asian population (*ACE* insertion compared to deletion).

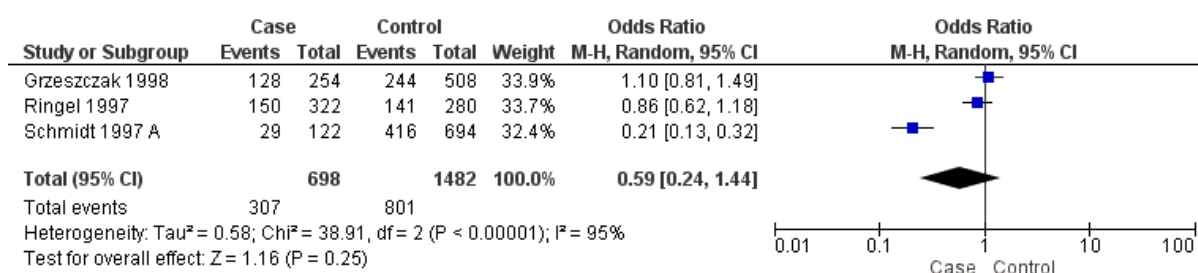

**Supplementary Figure S2h:** Forest plot - *ACE* I/D investigation, individuals with end-stage renal disease linked to type 2 diabetic nephropathy compared to individuals with type 2 diabetes mellitus in a European population (*ACE* insertion compared to deletion).

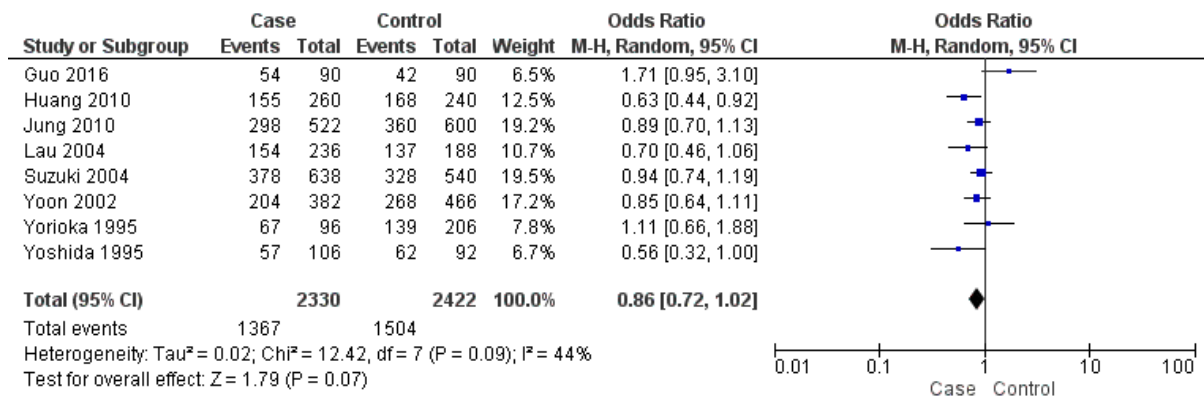

**Supplementary Figure S2i:** Forest plot - *ACE* I/D investigation, individuals with IgA nephropathy compared to healthy controls in an East Asian population (*ACE* insertion compared to deletion).

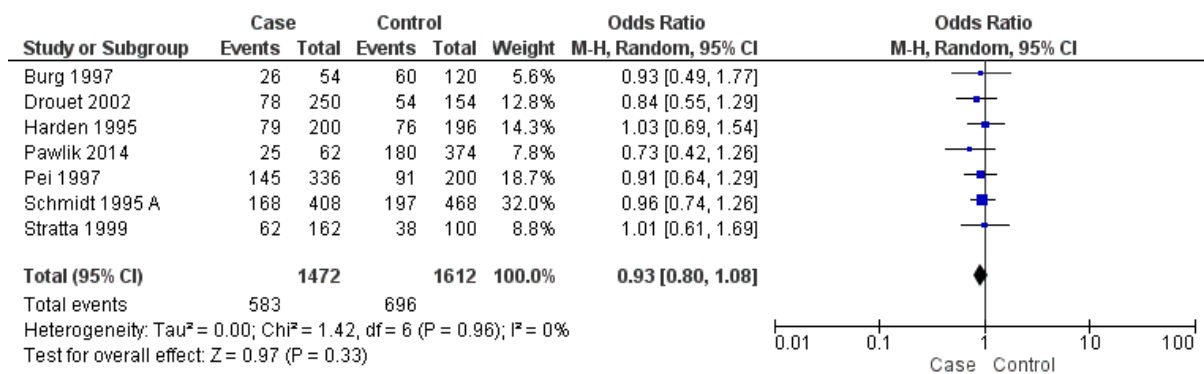

**Supplementary Figure S2j:** Forest plot - *ACE* I/D investigation, individuals with IgA nephropathy compared to healthy controls in a European population (*ACE* insertion compared to deletion).

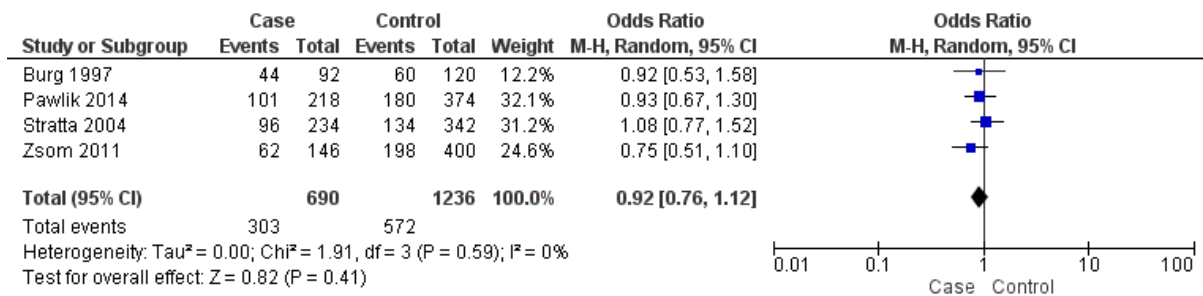

**Supplementary Figure S2k:** Forest plot - *ACE* I/D investigation, individuals with primary glomerulonephritis compared to healthy controls in a European population (*ACE* insertion compared to deletion).

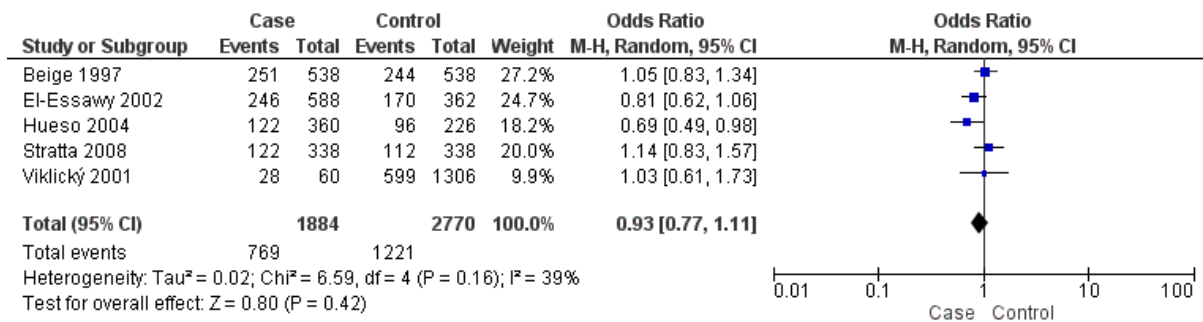

**Supplementary Figure S2l:** Forest plot - *ACE* I/D investigation, individuals who have had renal transplants compared to healthy controls in a European population (*ACE* insertion compared to deletion).

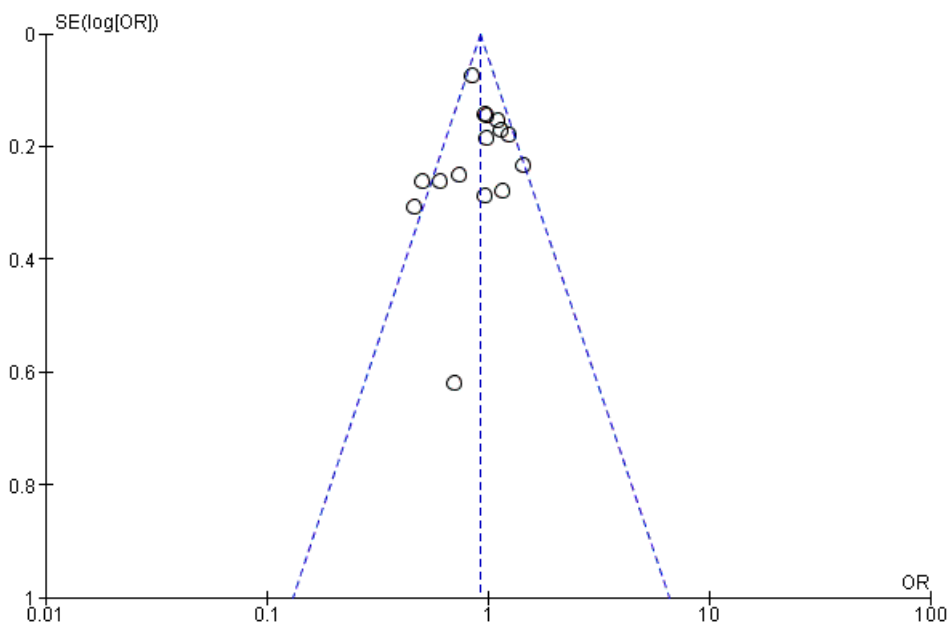

**Supplementary Figure S3a:** Funnel plot - *ACE* I/D investigation, individuals with type 1 diabetic nephropathy compared to individuals with type 1 diabetes mellitus in a European population (*ACE* insertion compared to deletion).

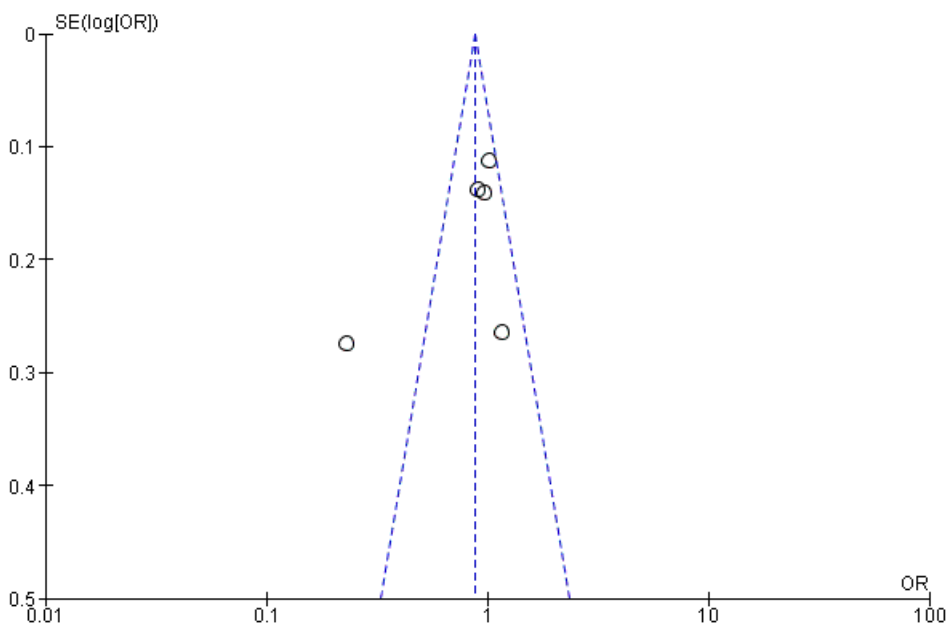

**Supplementary Figure S3b:** Funnel plot - *ACE* I/D investigation, individuals with type 2 diabetic nephropathy compared to individuals with type 2 diabetes mellitus in a European population (*ACE* insertion compared to deletion).

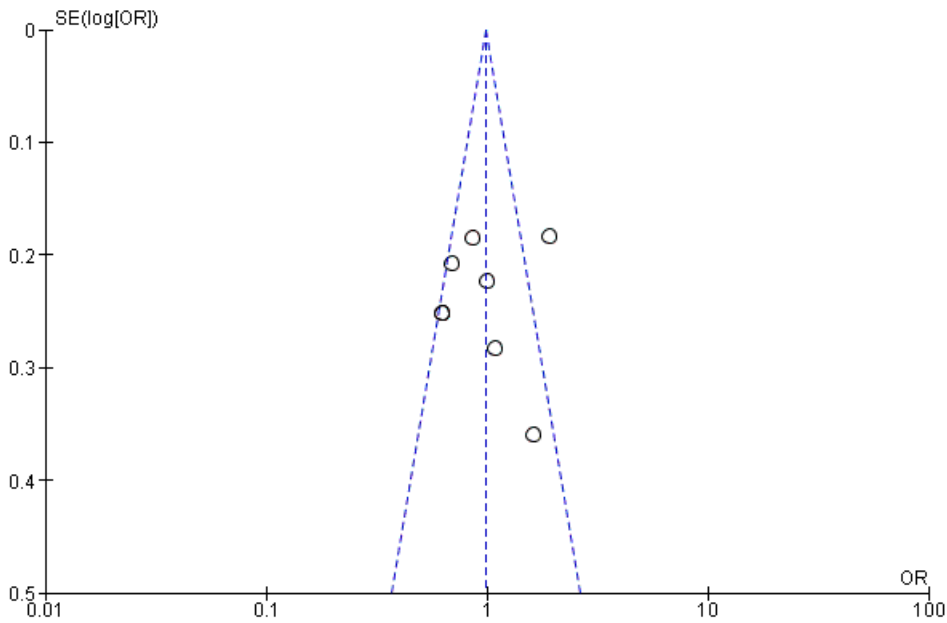

**Supplementary Figure S3c:** Funnel plot - *ACE* I/D investigation, individuals with type 2 diabetic nephropathy compared to individuals with type 2 diabetes mellitus in a Middle Eastern population (*ACE* insertion compared to deletion).

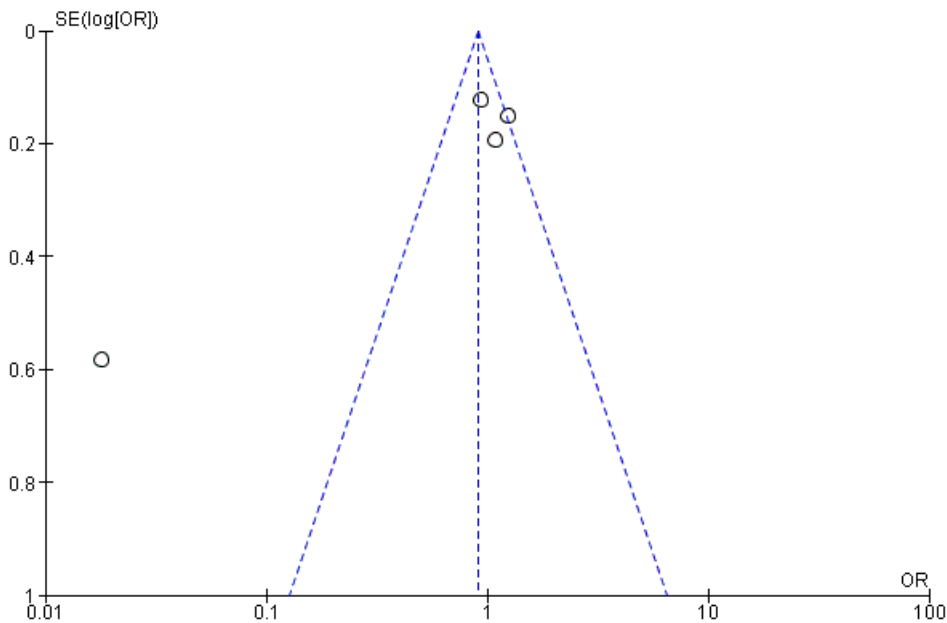

**Supplementary Figure S3d:** Funnel plot - *ACE* I/D investigation, individuals with chronic kidney disease compared to healthy controls in a South Asian population (*ACE* insertion compared to deletion).

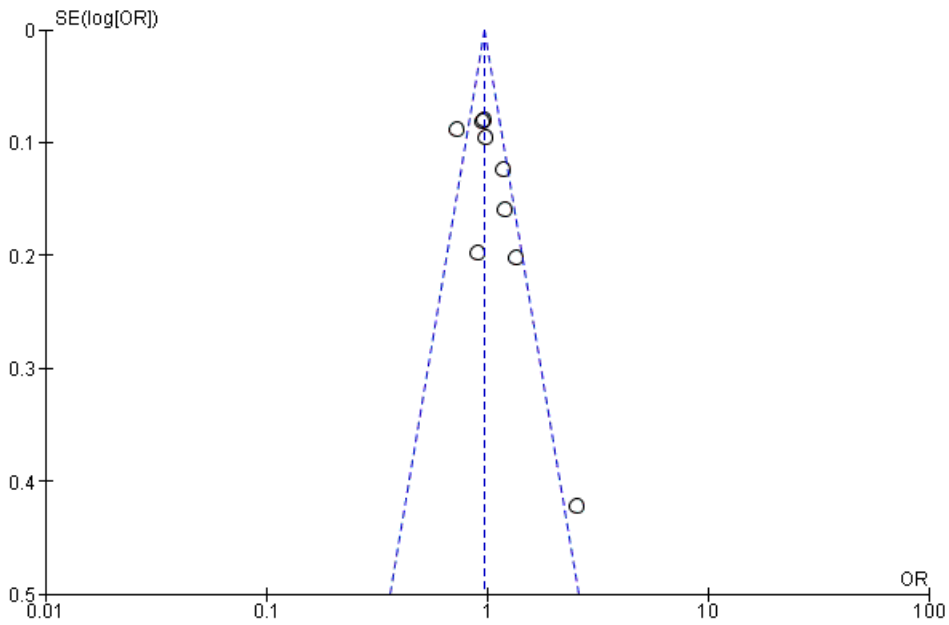

**Supplementary Figure S3e:** Funnel plot - *ACE* I/D investigation, individuals with end-stage renal disease compared to healthy controls in a European population (*ACE* insertion compared to deletion).

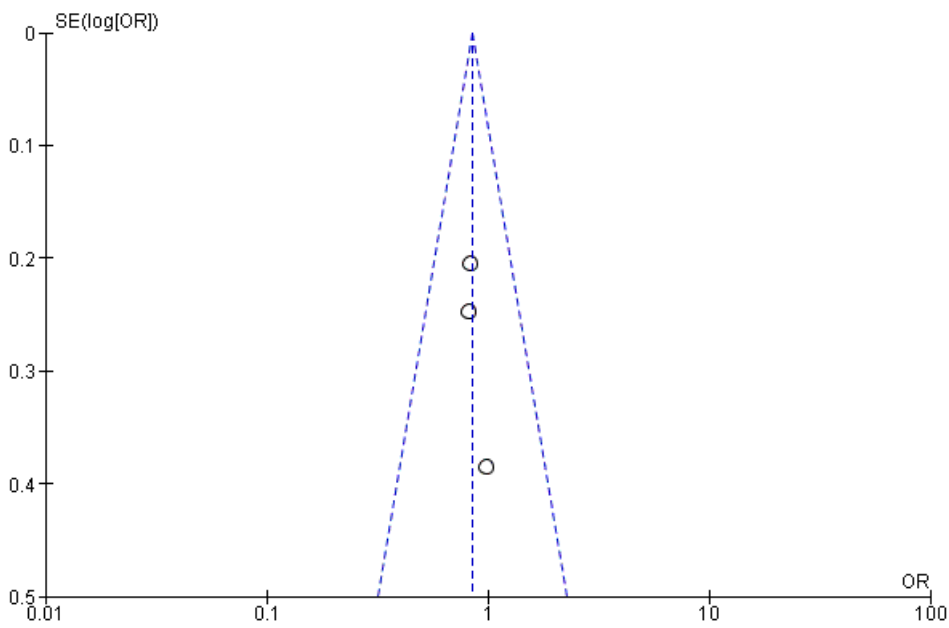

**Supplementary Figure S3f:** Funnel plot - *ACE* I/D investigation, individuals with end-stage renal disease compared to healthy controls in a Middle Eastern population (*ACE* insertion compared to deletion).

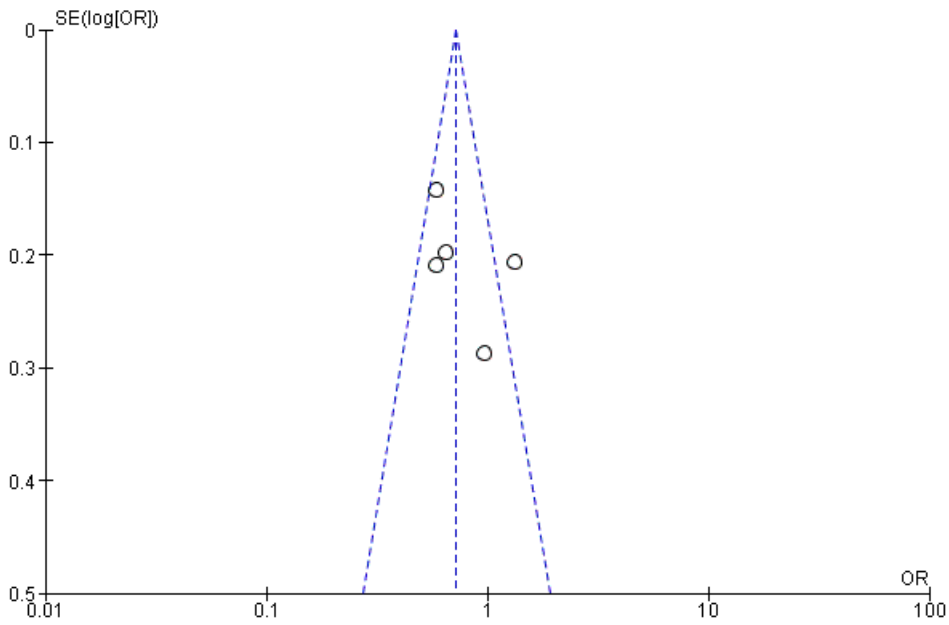

**Supplementary Figure S3g:** Funnel plot - *ACE* I/D investigation, individuals with end-stage renal disease linked to type 2 diabetic nephropathy compared to individuals with type 2 diabetes mellitus in an East Asian population (*ACE* insertion compared to deletion).

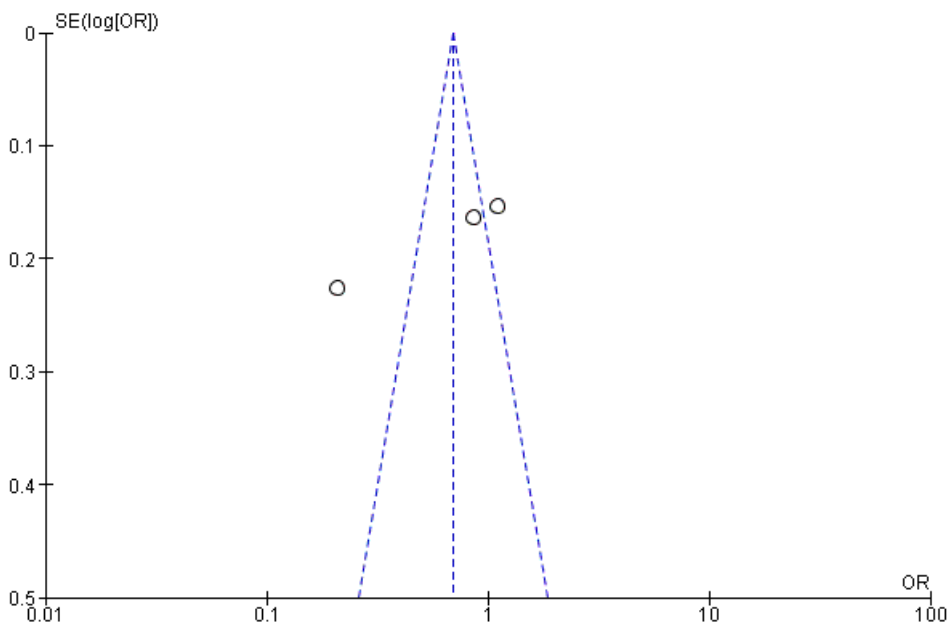

**Supplementary Figure S3h:** Funnel plot - *ACE* I/D investigation, individuals with end-stage renal disease linked to type 2 diabetic nephropathy compared to individuals with type 2 diabetes mellitus in a European population (*ACE* insertion compared to deletion).



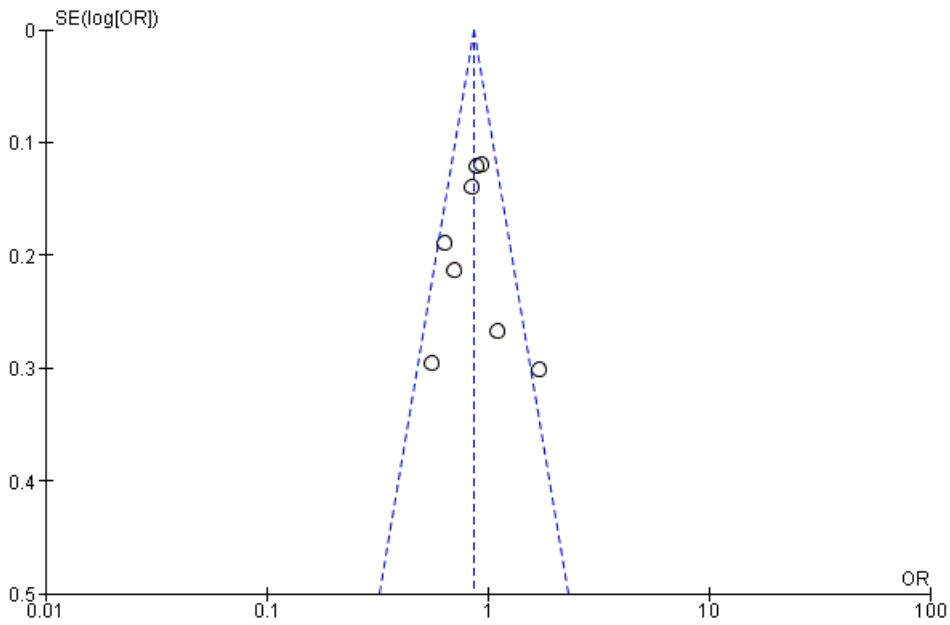

**Supplementary Figure S3i:** Funnel plot - *ACE* I/D investigation, individuals with IgA nephropathy compared to healthy controls in an East Asian population (*ACE* insertion compared to deletion).

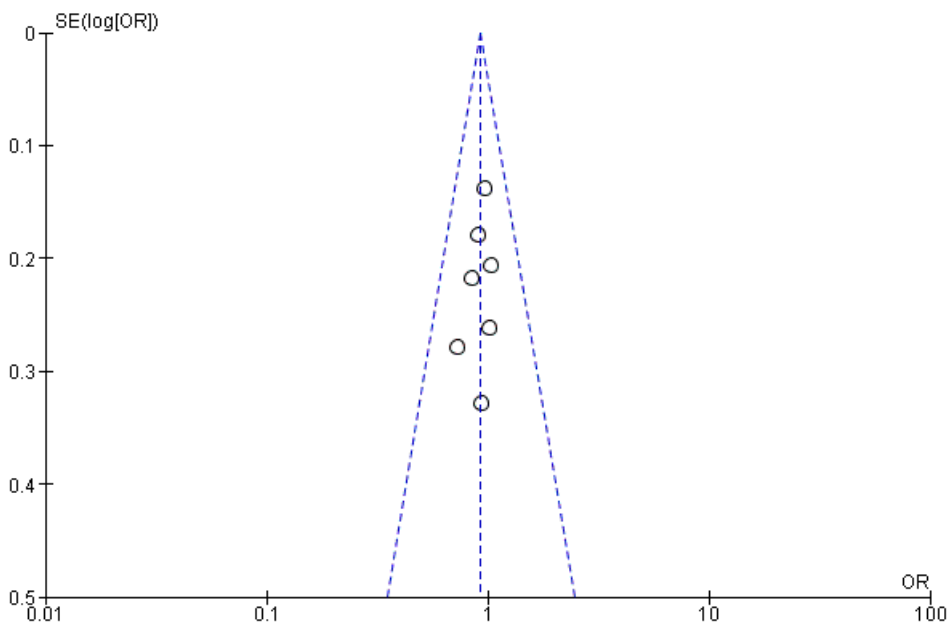

**Supplementary Figure S3j:** Funnel plot - *ACE* I/D investigation, individuals with IgA nephropathy compared to healthy controls in a European population (*ACE* insertion compared to deletion).

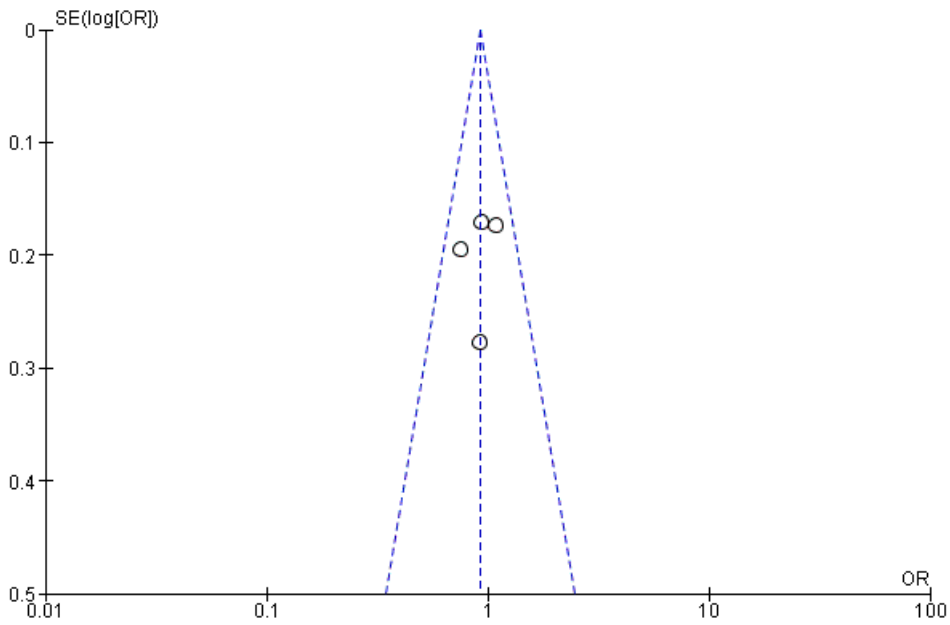

**Supplementary Figure S3k:** Funnel plot - *ACE* I/D investigation, individuals with primary glomerulonephritis compared to healthy controls in a European population (*ACE* insertion compared to deletion).

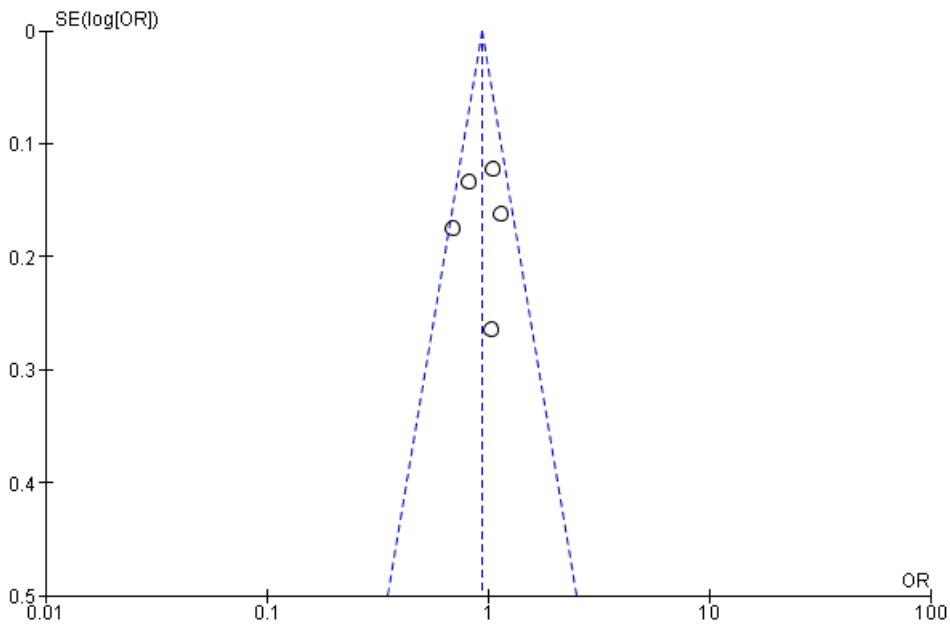

**Supplementary Figure S3l:** Funnel plot - *ACE* I/D investigation, individuals who have had renal transplants compared to healthy controls in a European population (*ACE* insertion compared to deletion).

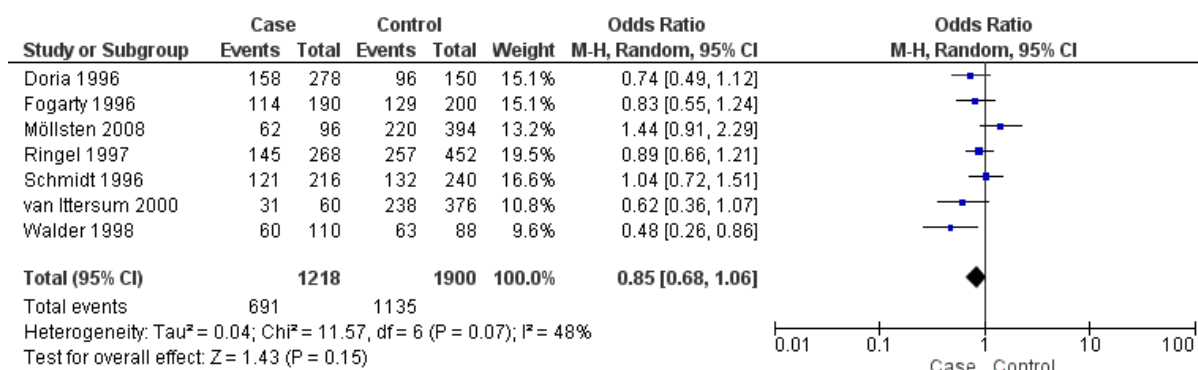

**Supplementary Figure S4a:** Forest plot - *AGT* rs699 investigation, individuals with type 1 diabetic nephropathy compared to individuals with type 1 diabetes mellitus in a European population (*AGT* rs699 T allele compared to C allele).

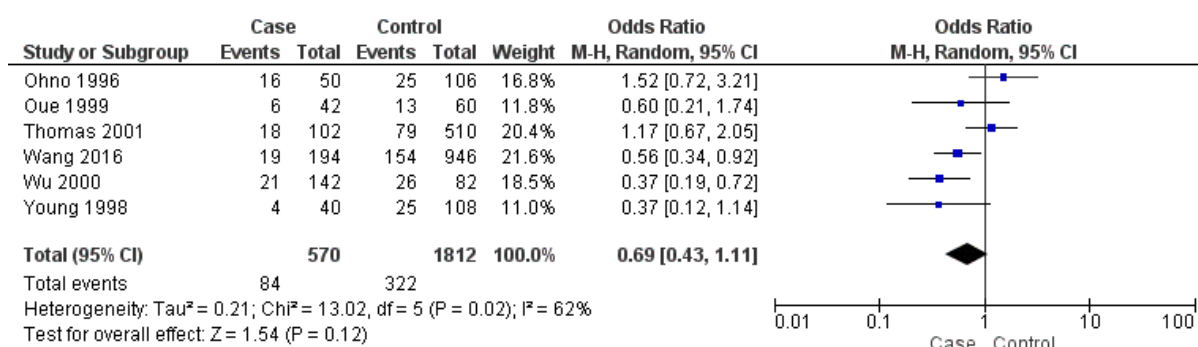

**Supplementary Figure S4b:** Forest plot - *AGT* rs699 investigation, individuals with type 2 diabetic nephropathy compared to individuals with type 2 diabetes mellitus in an East Asian population (*AGT* rs699 T allele compared to C allele).

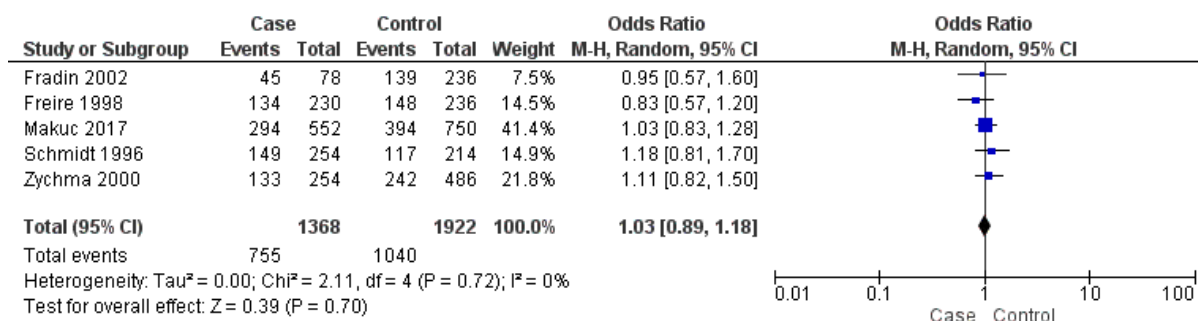

**Supplementary Figure S4c:** Forest plot - *AGT* rs699 investigation, individuals with type 2 diabetic nephropathy compared to individuals with type 2 diabetes mellitus in a European population (*AGT* rs699 T allele compared to C allele).

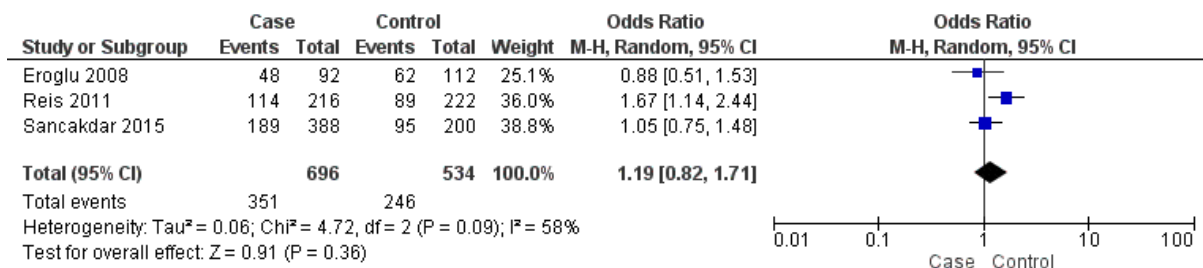

**Supplementary Figure S4d:** Forest plot - AGT rs699 investigation, individuals with type 2 diabetic nephropathy compared to individuals with type 2 diabetes mellitus in a Middle Eastern population (AGT rs699 T allele compared to C allele).

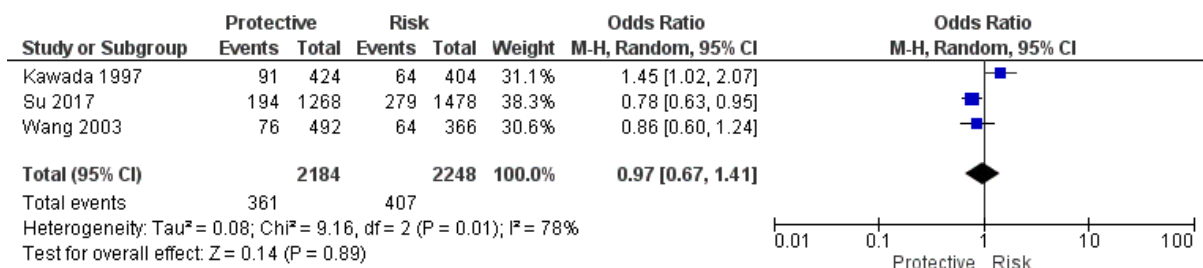

**Supplementary Figure S4e:** Forest plot - AGT rs699 investigation, individuals with end-stage renal disease compared to healthy controls in an East Asian population (AGT rs699 T allele compared to C allele).

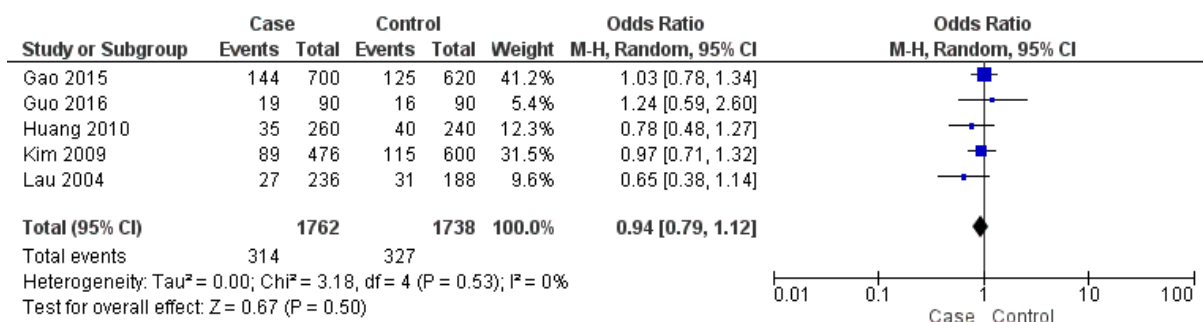

**Supplementary Figure S4f:** Forest plot - AGT rs699 investigation, individuals with IgA nephropathy compared to healthy controls in an East Asian population (AGT rs699 T allele compared to C allele).

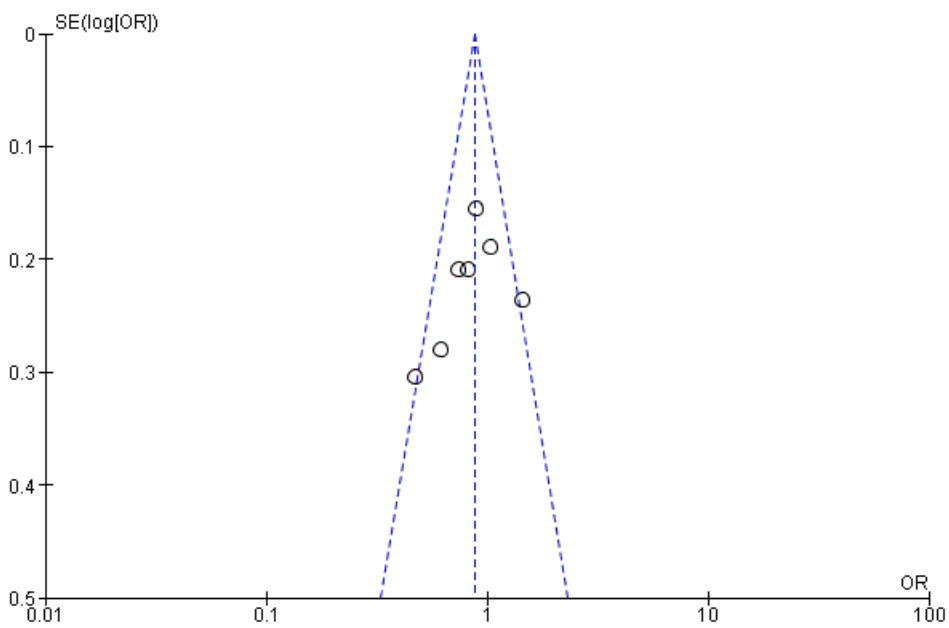

**Supplementary Figure S5a:** Funnel plot - *AGT* rs699 investigation, individuals with type 1 diabetic nephropathy compared to individuals with type 1 diabetes mellitus in a European population (*AGT* rs699 T allele compared to C allele).

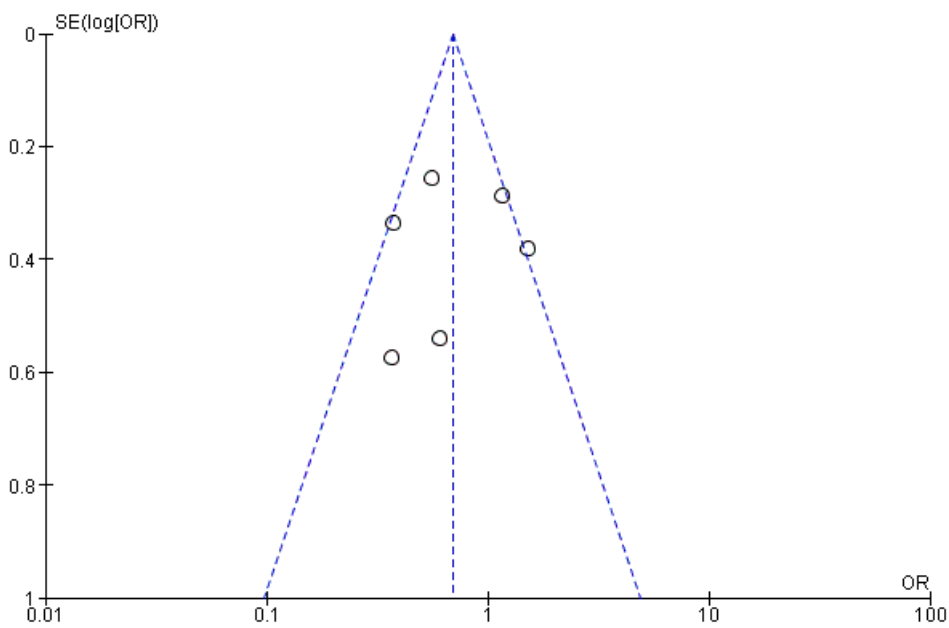

**Supplementary Figure S5b:** Funnel plot - *AGT* rs699 investigation, individuals with type 2 diabetic nephropathy compared to individuals with type 2 diabetes mellitus in an East Asian population (*AGT* rs699 T allele compared to C allele).

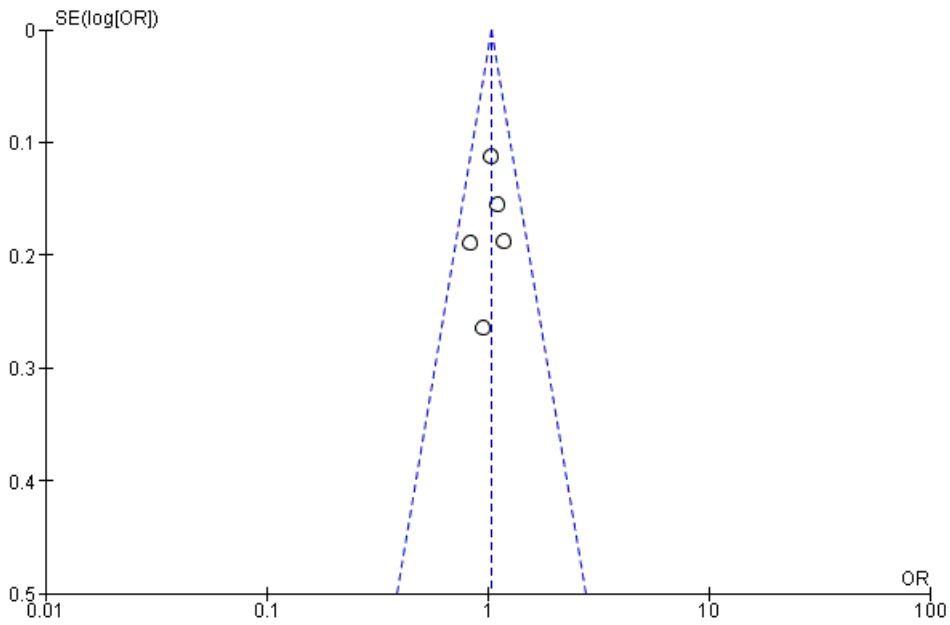

**Supplementary Figure S5c:** Funnel plot - *AGT* rs699 investigation, individuals with type 2 diabetic nephropathy compared to individuals with type 2 diabetes mellitus in a European population (*AGT* rs699 T allele compared to C allele).

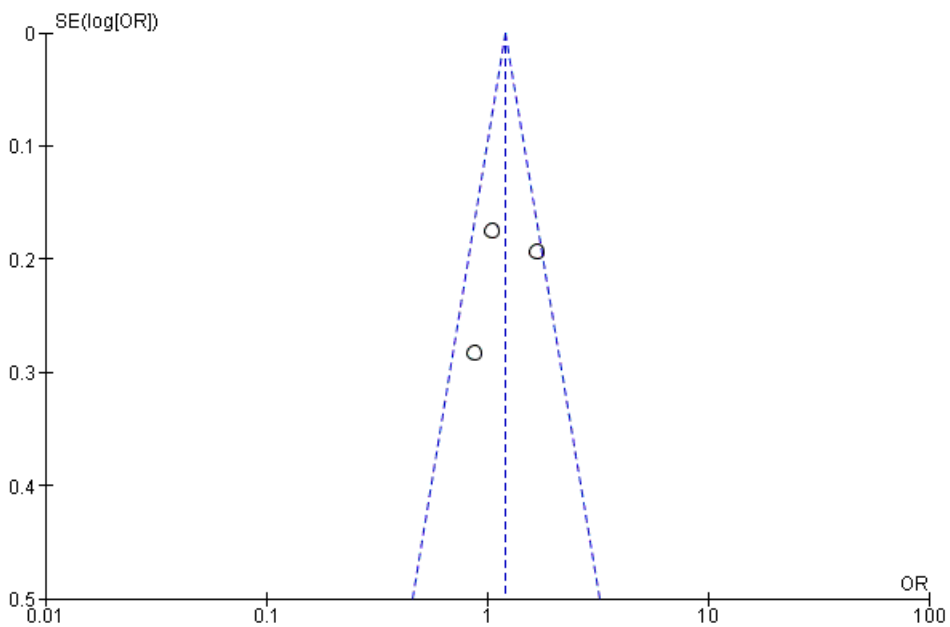

**Supplementary Figure S5d:** Funnel plot - *AGT* rs699 investigation, individuals with type 2 diabetic nephropathy compared to individuals with type 2 diabetes mellitus in a Middle Eastern population (*AGT* rs699 T allele compared to C allele).

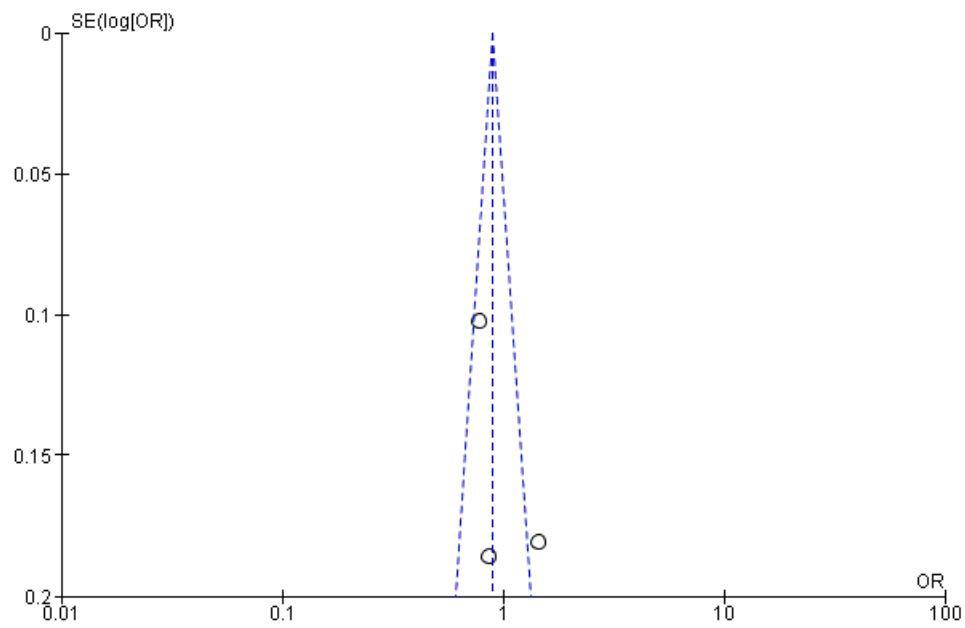

**Supplementary Figure S5e:** Funnel plot - *AGT* rs699 investigation, individuals with end-stage renal disease compared to healthy controls in an East Asian population (*AGT* rs699 T allele compared to C allele).

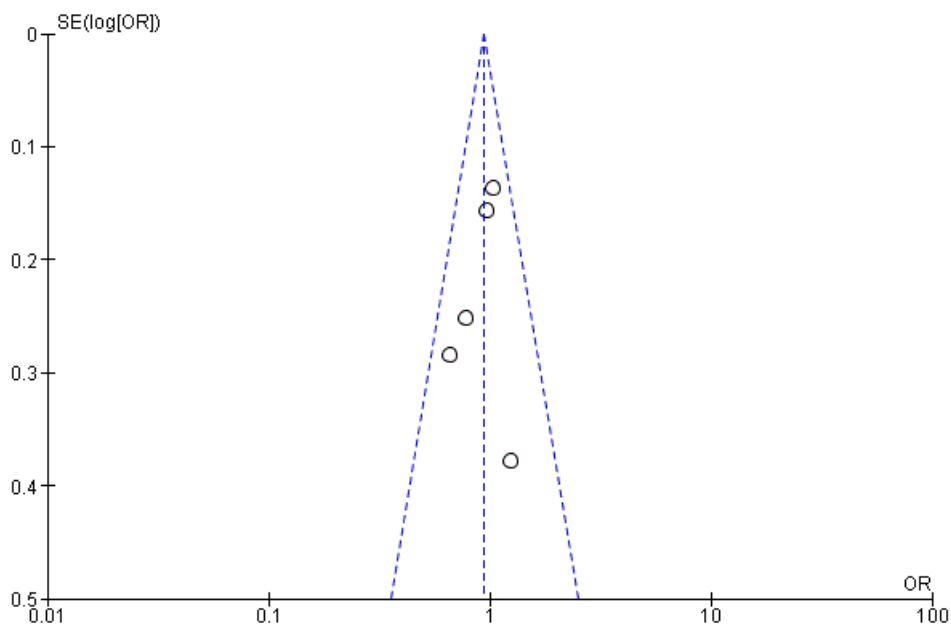

**Supplementary Figure S5f:** Funnel plot - *AGT* rs699 investigation, individuals with IgA nephropathy compared to healthy controls in an East Asian population (*AGT* rs699 T allele compared to C allele).

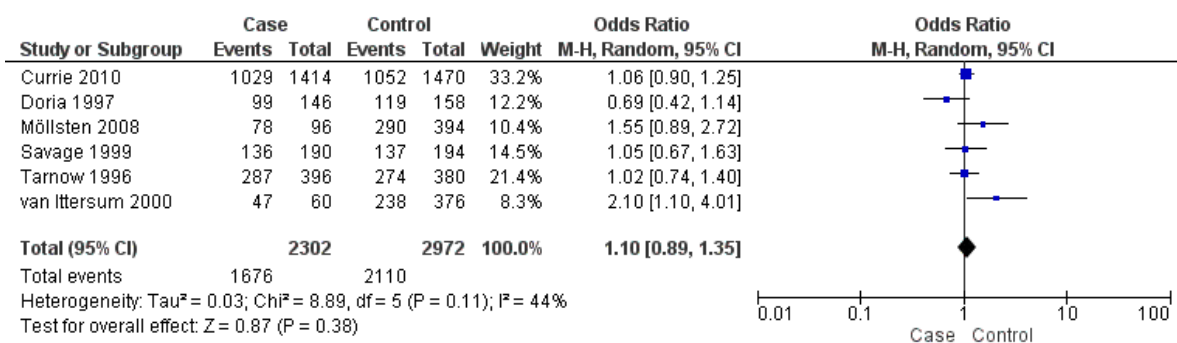

**Supplementary Figure S6a:** Forest plot - *AGTR1* rs5186 investigation, individuals with type 1 diabetic nephropathy compared to individuals with type 1 diabetes mellitus in a European population (*AGTR1* rs5186 A allele compared to C allele).

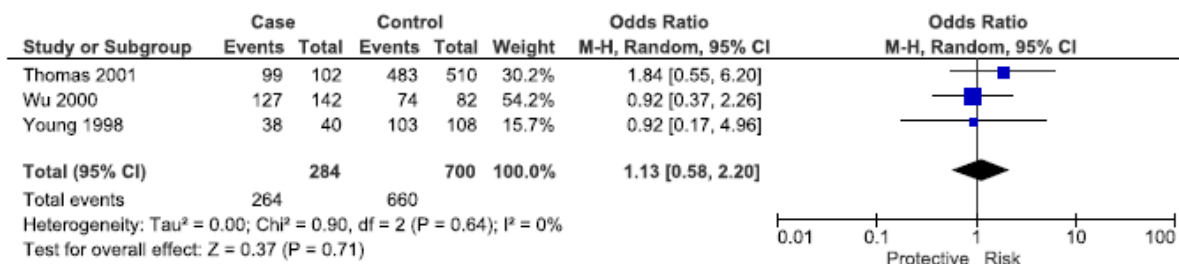

**Supplementary Figure S6b:** Forest plot - *AGTR1* rs5186 investigation, individuals with type 2 diabetic nephropathy compared to individuals with type 2 diabetes mellitus in an East Asian population (*AGTR1* rs5186 A allele compared to C allele).

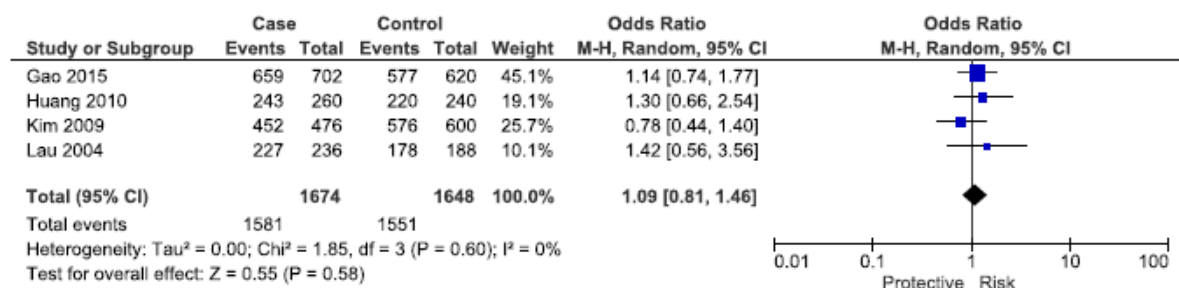

**Supplementary Figure S6c:** Forest plot - *AGTR1* rs5186 investigation, individuals with IgA nephropathy compared to healthy controls in an East Asian population (*AGTR1* rs5186 A allele compared to C allele).



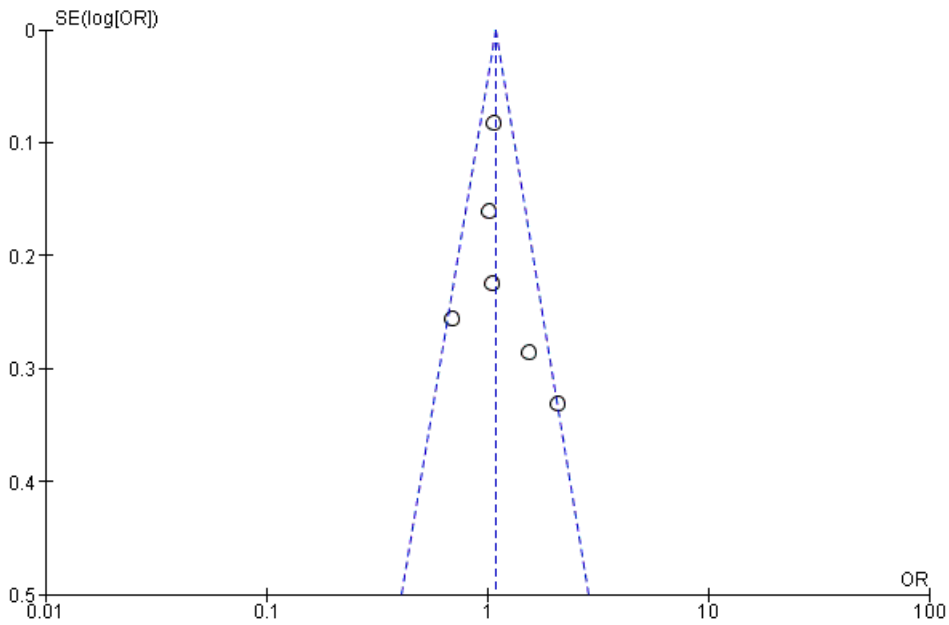

**Supplementary Figure S7a:** Funnel plot - *AGTR1* rs5186 investigation, individuals with type 1 diabetic nephropathy compared to individuals with type 1 diabetes mellitus in a European population (*AGTR1* rs5186 A allele compared to C allele).

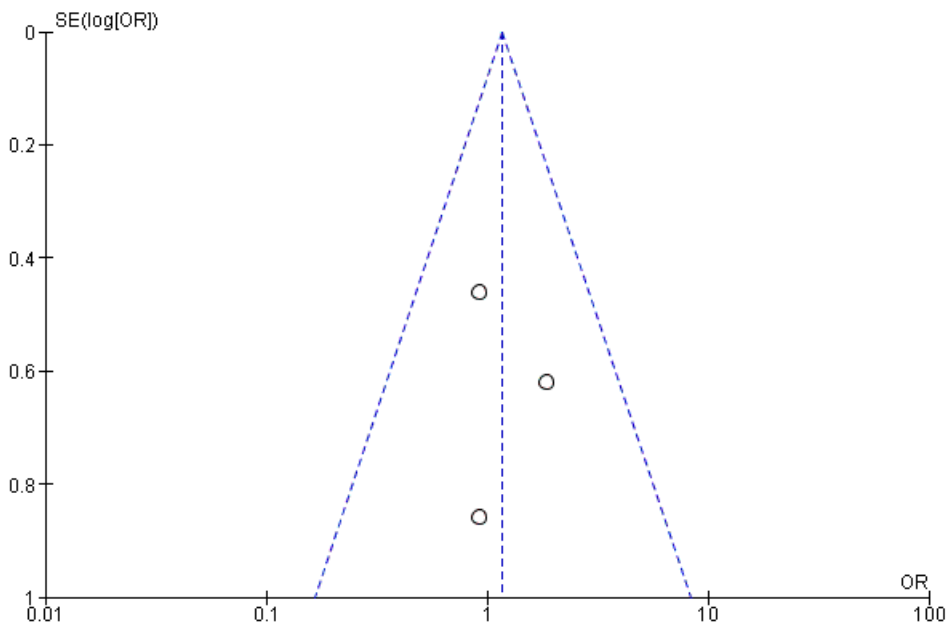

**Supplementary Figure S7b:** Funnel plot - *AGTR1* rs5186 investigation, individuals with type 2 diabetic nephropathy compared to individuals with type 2 diabetes mellitus in an East Asian population (*AGTR1* rs5186 A allele compared to C allele).

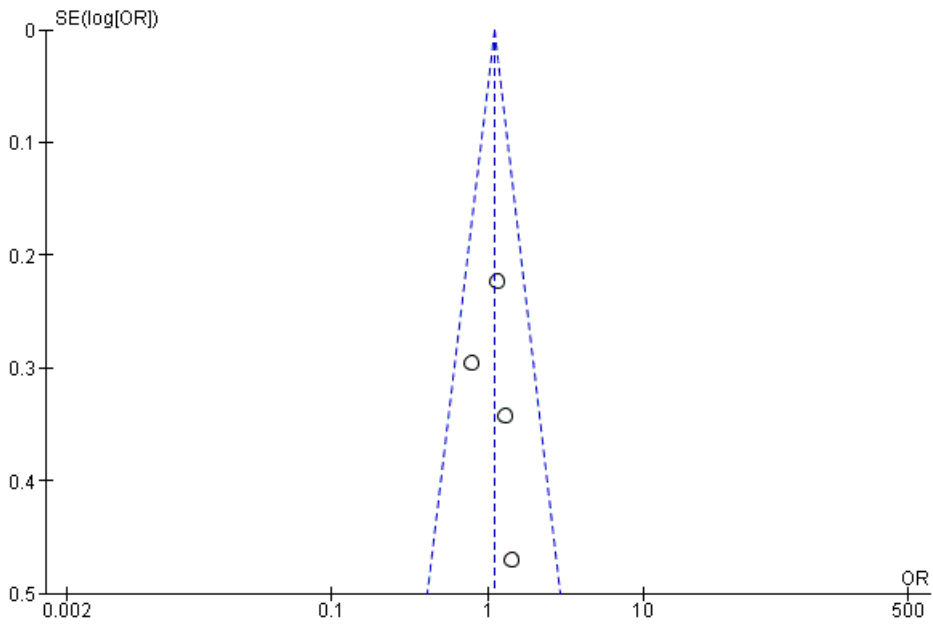

**Supplementary Figure S7c:** Funnel plot - *AGTR1* rs5186 investigation, individuals with IgA nephropathy compared to healthy controls in an East Asian population (*AGTR1* rs5186 A allele compared to C allele).
