# Supplementary material
Source: HighWire-hosted journal article supplement (https://bmjopen.bmj.com/content/9/4/e026777)
Supplement: inline-supplementary-material-3 [file inline-supplementary-material-3.pdf]

**Supplementary Data File S1.** Allele frequencies for all control populations which consisted of healthy individuals alongside the dbSNP reported frequencies

**AGT rs699 – East Asian populations included in meta-analysis**

- IgAN vs healthy controls
  - Five populations included in analysis
  - Allele frequencies are as follows:

| <b>AGT</b> | <b>Study</b>        | <b>Population</b> | <b>Sample Size</b> | <b>Reference allele frequency</b> | <b>Alternative allele frequency</b> |
|------------|---------------------|-------------------|--------------------|-----------------------------------|-------------------------------------|
| rs699      | Gao J et al.(49)    | East Asian        | 538                | A=0.202                           | G=0.798                             |
| rs699      | Guo Y et al.(77)    | East Asian        | 1265               | A=0.178                           | G=0.822                             |
| rs699      | Huang HD et al.(50) | East Asian        | 329                | A=0.167                           | G=0.833                             |
| rs699      | Kim SM et al.(51)   | East Asian        | 587                | A=0.192                           | G=0.808                             |
| rs699      | Lau YK et al.(25)   | East Asian        | 212                | A=0.165                           | G=0.835                             |

- ESRD vs healthy controls
  - Three populations included in analysis
  - Allele frequencies:

| <b>AGT</b> | <b>Study</b>        | <b>Population</b> | <b>Sample Size</b> | <b>Reference allele frequency</b> | <b>Alternative allele frequency</b> |
|------------|---------------------|-------------------|--------------------|-----------------------------------|-------------------------------------|
| rs699      | Kawada N et al.(22) | East Asian        | 424                | A=0.158                           | G=0.841                             |
| rs699      | Su SL et al.(157)   | East Asian        | 1373               | A=0.189                           | G=0.811                             |
| rs699      | Wang AY et al.(63)  | East Asian        | 429                | A=0.175                           | G=0.825                             |

- dbSNP frequencies:

| <b>AGT</b> | <b>Study</b>     | <b>Population</b> | <b>Sample Size</b> | <b>Reference allele frequency</b> | <b>Alternative allele frequency</b> |
|------------|------------------|-------------------|--------------------|-----------------------------------|-------------------------------------|
| rs699      | gnomAD - Genomes | East Asian        | 1622               | A=0.156                           | G=0.844                             |
| rs699      | 1000Genomes      | East Asian        | 1008               | A=0.147                           | G=0.853                             |

- Chi-square calculations for reference allele frequency comparing meta-analysed data with dbSNP data:

| <b>Group</b>                                                           | <b>gnomAD - Genomes</b> | <b>1000Genomes</b> |
|------------------------------------------------------------------------|-------------------------|--------------------|
| <b>AGT rs699 – East Asian populations<br/>IgAN vs Healthy Controls</b> | 0.999516                | 0.999582           |
| <b>AGT rs699 – East Asian populations<br/>ESRD vs Healthy Controls</b> | 0.984359                | 0.985654           |

**AGT rs699 – European populations included in meta-analysis**

- ESRD vs healthy controls
  - Four populations included in analysis
  - Allele frequencies are as follows:

| <b>AGT</b> | <b>Study</b>             | <b>Population</b> | <b>Sample Size</b> | <b>Reference allele frequency</b> | <b>Alternative allele frequency</b> |
|------------|--------------------------|-------------------|--------------------|-----------------------------------|-------------------------------------|
| rs699      | Beige J et al. (146)     | European          | 538                | A=0.573                           | G=0.427                             |
| rs699      | Buraczynska M et al.(65) | European          | 1265               | A=0.542                           | G=0.458                             |
| rs699      | Losito A et al.(67)      | European          | 329                | A=0.562                           | G=0.438                             |
| rs699      | Lovati E et al.(147)     | European          | 587                | A=0.601                           | G=0.399                             |

- dbSNP frequencies:

| <b>AGT</b> | <b>Study</b>     | <b>Population</b> | <b>Sample Size</b> | <b>Reference allele frequency</b> | <b>Alternative allele frequency</b> |
|------------|------------------|-------------------|--------------------|-----------------------------------|-------------------------------------|
| rs699      | gnomAD - Genomes | European          | 18440              | A=0.5616                          | G=0.4384                            |
| rs699      | gnomAD - Exomes  | European          | 133914             | A=0.57665                         | G=0.42335                           |
| rs699      | 1000Genomes      | European          | 1006               | A=0.588                           | G=0.412                             |
| rs699      | ExAC             | European          | 73258              | A=0.5747                          | G=0.4253                            |

- Chi-square calculations for alternative allele frequency comparing meta-analysed data with dbSNP data:

| <b>Group</b>                                                         | <b>gnomAD - Genomes</b> | <b>gnomAD - Exomes</b> | <b>1000Genomes</b> | <b>ExAC</b> |
|----------------------------------------------------------------------|-------------------------|------------------------|--------------------|-------------|
| <b>AGT rs699 – European populations<br/>ESRD vs Healthy Controls</b> | 0.979214                | 0.980521               | 0.981483           | 0.980354    |

**AGTR1 rs5186 – East Asian populations included in meta-analysis**

- IgAN vs healthy controls
  - Four populations included in analysis
  - Allele frequencies are as follows:

| <b>AGTR1</b>  | <b>Study</b>        | <b>Population</b> | <b>Sample Size</b> | <b>Reference allele frequency</b> | <b>Alternative allele frequency</b> |
|---------------|---------------------|-------------------|--------------------|-----------------------------------|-------------------------------------|
| <b>rs5186</b> | Gao J et al.(49)    | East Asian        | 661                | A=0.931                           | G=0.069                             |
| <b>rs5186</b> | Huang HD et al.(50) | East Asian        | 250                | A=0.917                           | G=0.083                             |
| <b>rs5186</b> | Kim SM et al.(51)   | East Asian        | 538                | A=0.960                           | G=0.04                              |
| <b>rs5186</b> | Lau YK et al.(25)   | East Asian        | 212                | A=0.947                           | G=0.053                             |

- dbSNP frequencies:

| <b>AGTR1</b>  | <b>Study</b>     | <b>Population</b> | <b>Sample Size</b> | <b>Reference allele frequency</b> | <b>Alternative allele frequency</b> |
|---------------|------------------|-------------------|--------------------|-----------------------------------|-------------------------------------|
| <b>rs5186</b> | gnomAD - Genomes | East Asian        | 1618               | A=0.944                           | C=0.056                             |
| <b>rs5186</b> | 1000Genomes      | East Asian        | 1008               | A=0.940                           | C=0.060                             |

- Chi-square calculations for alternative allele frequency comparing meta-analysed data with dbSNP data:

| <b>Group</b>                                                              | <b>gnomAD - Genomes</b> | <b>1000Genomes</b> |
|---------------------------------------------------------------------------|-------------------------|--------------------|
| <b>AGTR1 rs5186 – East Asian populations<br/>IgAN vs Healthy Controls</b> | 0.999615                | 0.999559           |

**ACE insertion/deletion – European, East Asian, South Asian and Middle Eastern populations included in meta-analysis**

- Four reported rs numbers for this SNP rs numbers (rs13447447, rs1799752, rs4340, rs4646994) were not found in dbSNP and therefore no reported allele frequencies were available for comparison.
